# Supplementary material for: PhI(OAc)2-mediated C–N bond cleavage of acylhydrazines with amines for the synthesis of amides
Source: Royal Society of Chemistry journal article supplement (doi:10.1039/d2nj05938j), 2023-01-01

## Supporting Informations

### **PhI(OAc)<sub>2</sub>-mediated C–N bond cleavage of acylhydrazines with amines for the synthesis of amides**

Shun Yang,<sup>a#</sup> Haiying Tian,<sup>b#</sup> Ling Li,<sup>a</sup> Ying Wang,<sup>a</sup> Cong Xie,<sup>a\*</sup> Xiuling Chen<sup>a\*</sup>

<sup>a</sup>School of Nuclear Technology and Chemistry & Biology, Hubei University of Science and Technology, Xianning 437100, China

<sup>b</sup>Department of Pharmacy, Changzhi Medical College, 046000 Changzhi (P. R. China)  
E-mail: cxl828800@163.com; Fax: (+) 86-715-8338007

## Contents

|                                                            |      |
|------------------------------------------------------------|------|
| General procedure                                          | 3    |
| General experimental procedure for the synthesis of amides | 3    |
| $^1\text{H}$ NMR and $^{13}\text{C}$ NMR data of products  | 3-7  |
| References                                                 | 7    |
| Copies of $^1\text{H}$ and $^{13}\text{C}$ NMR spectra     | 8-30 |

## 1. General remarks

All non-aqueous reactions and manipulations were performed in oxygen atmosphere. The reactions were monitored by GC and GC-MS. The  $^1\text{H}$  NMR and  $^{13}\text{C}$  NMR spectra were recorded on a Bruker ADVANCE III spectrometer at 400 MHz and 100 MHz, respectively, and chemical shifts were reported in parts per million (ppm). Flash column chromatography was performed using silica gel 300-400  $\mu\text{m}$ . GC-MS results were recorded on GC-MS QP2010, and GC analysis was performed on GC 7820A. Hydrazines were purchased from Energy Chemical, Alfa Aesar, Aladdin or Maya Reagent; amines were purchased from Aladdin, dried by standard methods before using.

## 2. General experimental procedure for the synthesis of amides

A 25 ml Schlenk-type tube equipped with a magnetic stir bar was charged with substrate **1** (**1a-1k**) (0.2 mmol),  $\text{PhI}(\text{OAc})_2$  (0.4 mmol), *n*-butyl ammonium iodide (0.4 mmol). The reaction tube was evacuated and back-filled with  $\text{N}_2$ . Amine **2** (**2a-2m**) (0.24 mmol) and  $\text{CCl}_4$  (2 mL) were added at room temperature under  $\text{N}_2$  atmosphere, then the reaction mixture was stirred at 130  $^\circ\text{C}$  for 12 h. The reaction was monitored by GC or GC-MS. After completion of the reaction, the resulting solution was cooled to room temperature, and neutralized with saturated solution of NaCl. The product was extracted with EtOAc, dried over anhydrous  $\text{Na}_2\text{SO}_4$  and concentrated in vacuo. The crude product was purified by flash column chromatography on silica gel to give analytically pure product.

## 3. $^1\text{H}$ NMR and $^{13}\text{C}$ NMR data of products

### *N*-propylbenzamide (**3a**)<sup>1</sup>

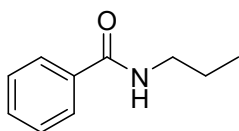

Eluent: petroleum ether/ethyl acetate (10:1).  $^1\text{H}$  NMR (400 MHz,  $\text{CDCl}_3$ ):  $\delta$  7.76 (d, 2H,  $J = 6.8$  Hz), 7.49 (t, 1H,  $J = 7.4$  Hz), 7.42 (t, 2H,  $J = 7.6$  Hz), 6.29 (s, br, 1H), 3.43 (q, 2H,  $J = 6.8$  Hz), 1.59-1.69 (m, 2H), 0.98 (t, 3H,  $J = 7.4$  Hz);  $^{13}\text{C}$  NMR (100 MHz,  $\text{CDCl}_3$ ):  $\delta$  167.6, 134.9, 131.3, 128.5, 126.9, 41.8, 22.9, 11.4. GC-MS:  $m/z = 163.09$ .

### *N*-isopropylbenzamide (**3b**)<sup>1</sup>

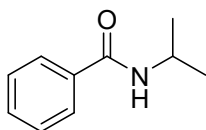

Eluent: petroleum ether/ethyl acetate (10:1).  $^1\text{H}$  NMR (400 MHz,  $\text{CDCl}_3$ ):  $\delta$  7.74 (d, 2H,  $J = 7.2$  Hz), 7.47 (d, 1H,  $J = 7.2$  Hz), 7.41 (d, 2H,  $J = 7.2$  Hz), 6.06 (s, br, 1H), 4.24-4.33 (m, 1H), 1.25 (d, 6H,  $J = 6.4$  Hz);  $^{13}\text{C}$  NMR (100 MHz,  $\text{CDCl}_3$ ):  $\delta$  167.6, 134.9, 131.3, 128.5, 126.9, 41.8, 22.9, 11.4. GC-MS:  $m/z = 163.09$ .

### *N*-isobutylbenzamide (**3c**)<sup>1</sup>

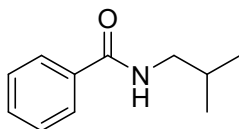

Eluent: petroleum ether/ethyl acetate (10:1).  $^1\text{H}$  NMR (400 MHz,  $\text{CDCl}_3$ ):  $\delta$  7.76 (d, 2H,  $J = 6.8$  Hz), 7.49 (d, 1H,  $J = 7.4$  Hz), 7.42 (d, 2H,  $J = 7.2$  Hz), 6.32 (s, br, 1H), 3.28 (d, 2H,  $J = 6.4$  Hz), 1.86-1.94 (m, 1H), 0.97 (d, 6H,  $J = 6.8$  Hz);  $^{13}\text{C}$  NMR (100 MHz,  $\text{CDCl}_3$ ):  $\delta$  167.7, 134.9, 131.3, 128.6, 126.9, 47.4, 28.6, 20.2. GC-MS:  $m/z = 177.11$ .

### *N*-(*tert*-butyl)benzamide (**3d**)<sup>3</sup>

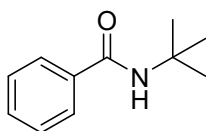

Eluent: petroleum ether/ethyl acetate (10:1).  $^1\text{H}$  NMR (400 MHz,  $\text{CDCl}_3$ ):  $\delta$  7.71 (d, 2H,  $J = 6.8$  Hz), 7.47 (d, 1H,  $J = 7.2$  Hz), 7.41 (d, 2H,  $J = 7.4$  Hz), 5.94 (s, br, 1H), 1.47 (s, 9H);  $^{13}\text{C}$  NMR (100 MHz,  $\text{CDCl}_3$ ):  $\delta$  167.7, 134.9, 131.3, 128.6, 126.9, 47.4, 28.6, 20.2. GC-MS:  $m/z = 177.11$ .

### *N*-phenethylbenzamide (**3e**)<sup>1</sup>

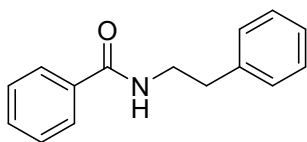

Eluent: petroleum ether/ethyl acetate (10:1).  $^1\text{H}$  NMR (400 MHz,  $\text{CDCl}_3$ ):  $\delta$  7.68 (d, 2H,  $J = 8.0$  Hz), 7.47 (t, 1H,  $J = 7.4$  Hz), 7.39 (t, 2H,  $J = 7.4$  Hz), 7.32 (t, 2H,  $J = 7.4$  Hz), 7.24 (t, 3H,  $J = 6.2$  Hz), 6.22 (s, br, 1H), 3.37 (q, 2H,  $J = 6.6$  Hz), 2.93 (t, 2H,  $J = 7.0$  Hz);  $^{13}\text{C}$  NMR (100 MHz,  $\text{CDCl}_3$ ):  $\delta$  167.5, 138.9, 134.7, 131.4, 128.8, 128.7, 128.6, 126.8, 126.6, 41.2, 35.7. GC-MS:  $m/z = 225.11$ .

*N*-(2-hydroxyethyl)benzamide (**3f**)

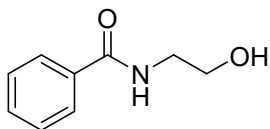

Eluent: petroleum ether/ethyl acetate (10:1).  $^1\text{H}$  NMR (400 MHz,  $\text{CDCl}_3$ ):  $\delta$  7.78 (d, 2H,  $J = 8.4$  Hz), 7.53 (t, 1H,  $J = 6.8$  Hz), 7.45 (t, 2H,  $J = 7.4$  Hz), 6.58 (s, br, 1H), 3.81 (t, 2H,  $J = 5.8$  Hz), 3.75 (t, 2H,  $J = 5.0$  Hz);  $^{13}\text{C}$  NMR (100 MHz,  $\text{CDCl}_3$ ):  $\delta$  167.6, 134.1, 131.7, 128.7, 126.9, 44.2, 41.7. HRMS (EI): calcd for  $\text{C}_9\text{H}_{11}\text{NO}_2$ : 165.0790; found: 165.0754.

*N*-(3-methoxypropyl)benzamide (**3g**)

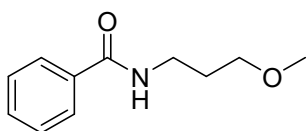

Eluent: petroleum ether/ethyl acetate (10:1).  $^1\text{H}$  NMR (400 MHz,  $\text{CDCl}_3$ ):  $\delta$  7.75 (d, 2H,  $J = 6.8$  Hz), 7.48 (t, 1H,  $J = 7.2$  Hz), 7.45 (t, 2H,  $J = 7.2$  Hz), 6.99 (s, br, 1H), 3.54-3.59 (m, 4H), 3.38 (s, 3H), 1.86-1.92 (m, 2H);  $^{13}\text{C}$  NMR (100 MHz,  $\text{CDCl}_3$ ):  $\delta$  167.3, 134.8, 131.2, 128.5, 126.8, 72.2, 58.9, 38.9, 28.9. HRMS (EI): calcd for  $\text{C}_{11}\text{H}_{15}\text{NO}_2$ : 193.1103; found: 193.1122.

*N*-benzylbenzamide (**3h**)<sup>2</sup>

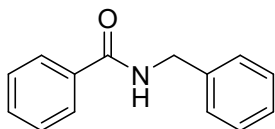

Eluent: petroleum ether/ethyl acetate (10:1).  $^1\text{H}$  NMR (400 MHz,  $\text{CDCl}_3$ ):  $\delta$  7.79 (d, 2H,  $J = 7.2$  Hz), 7.48 (t, 1H,  $J = 7.2$  Hz), 7.40 (t, 2H,  $J = 7.2$  Hz), 7.29-7.34 (m, 5H), 6.60 (s, br, 1H), 4.61 (d, 2H,  $J = 5.6$  Hz);  $^{13}\text{C}$  NMR (100 MHz,  $\text{CDCl}_3$ ):  $\delta$  167.4, 138.2, 134.4, 131.6, 128.8, 128.6, 127.9, 127.6, 126.9, 44.2. GC-MS:  $m/z = 211.09$ .

*N*-(4-bromobenzyl)benzamide (**3i**)<sup>2</sup>

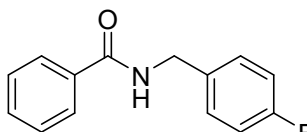

Eluent: petroleum ether/ethyl acetate (10:1).  $^1\text{H}$  NMR (400 MHz,  $\text{CDCl}_3$ ):  $\delta$  7.79 (d, 2H,  $J = 7.2$  Hz), 7.41-7.52 (m, 5H), 7.23 (d, 2H,  $J = 8.4$  Hz), 6.53 (s, br, 1H), 4.58 (d, 2H,  $J = 6.0$  Hz);  $^{13}\text{C}$  NMR (100 MHz,  $\text{CDCl}_3$ ):  $\delta$  167.4, 137.3, 134.2, 131.8, 131.7, 129.6, 128.7, 126.9, 121.5, 43.3. GC-MS:  $m/z = 289.01$ .

*N*-(4-methoxybenzyl)benzamide (**3j**)<sup>2</sup>

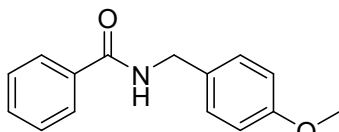

Eluent: petroleum ether/ethyl acetate (10:1).  $^1\text{H}$  NMR (400 MHz,  $\text{CDCl}_3$ ):  $\delta$  7.79 (d, 2H,  $J = 7.2$  Hz), 7.49 (t, 1H,  $J = 7.4$  Hz), 7.42 (t, 2H,  $J = 7.4$  Hz), 7.28 (d, 3H,  $J = 8.4$  Hz), 6.88 (d, 2H,  $J = 8.8$  Hz), 6.33 (s, br, 1H), 4.57 (d, 2H,  $J = 5.2$  Hz), 3.81 (s, 3H);  $^{13}\text{C}$  NMR (100 MHz,  $\text{CDCl}_3$ ):  $\delta$  167.4, 137.3, 134.2, 131.8, 131.7, 129.6, 128.7, 126.9, 121.5, 43.3. GC-MS:  $m/z = 241.11$ .

morpholino(phenyl)methanone (**3k**)<sup>3</sup>

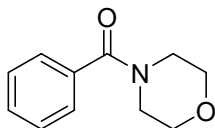

Eluent: petroleum ether/ethyl acetate (5:1). <sup>1</sup>H NMR (400 MHz, CDCl<sub>3</sub>): δ 7.39-7.43 (m, 5H), 3.75 (s, br, 4H), 3.46 (s, br, 2H); <sup>13</sup>C NMR (100 MHz, CDCl<sub>3</sub>): δ 170.5, 135.3, 129.9, 128.6, 127.1, 66.9, 51.9, 46.5. GC-MS: m/z = 191.09.

phenyl(pyrrolidin-1-yl)methanone (**3l**)<sup>3</sup>

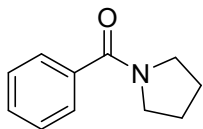

Eluent: petroleum ether/ethyl acetate (5:1). <sup>1</sup>H NMR (400 MHz, CDCl<sub>3</sub>): δ 7.50-7.53 (m, 2H), 7.39-7.40 (m, 3H), 3.65 (t, 2H, *J* = 7.0 Hz), 3.42 (t, 2H, *J* = 6.6 Hz), 1.93-1.99 (m, 2H), 1.86-1.90 (m, 2H); <sup>13</sup>C NMR (100 MHz, CDCl<sub>3</sub>): δ 169.7, 137.3, 129.8, 128.2, 127.1, 49.6, 46.2, 26.4, 24.5. GC-MS: m/z = 175.09.

phenyl(piperidin-1-yl)methanone (**3m**)<sup>3</sup>

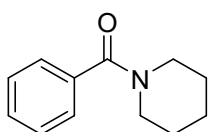

Eluent: petroleum ether/ethyl acetate (5:1). <sup>1</sup>H NMR (400 MHz, CDCl<sub>3</sub>): δ 7.39 (s, 5H), 3.71 (s, br, 2H), 1.68 (s, br, 4H), 1.56 (s, br, 4H); <sup>13</sup>C NMR (100 MHz, CDCl<sub>3</sub>): δ 170.3, 136.5, 129.4, 128.4, 126.8, 47.9, 25.8, 24.6. GC-MS: m/z = 189.11.

4-methyl-*N*-propylbenzamide (**3n**)<sup>1</sup>

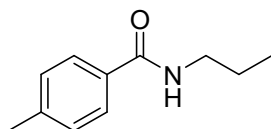

Eluent: petroleum ether/ethyl acetate (10:1). <sup>1</sup>H NMR (400 MHz, CDCl<sub>3</sub>): δ 7.66 (d, 2H, *J* = 8.0 Hz), 7.21 (d, 2H, *J* = 8.0 Hz), 6.10 (s, br, 1H), 3.43 (q, 2H, *J* = 7.0 Hz), 2.39 (s, 3H), 1.59-1.68 (m, 2H), 0.98 (t, 3H, *J* = 7.4 Hz); <sup>13</sup>C NMR (100 MHz, CDCl<sub>3</sub>): δ 167.5, 141.7, 132.1, 129.2, 126.8, 41.7, 22.9, 21.4, 11.4. GC-MS: m/z = 177.11.

4-methoxy-*N*-propylbenzamide (**3o**)<sup>1</sup>

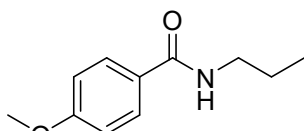

Eluent: petroleum ether/ethyl acetate (10:1). <sup>1</sup>H NMR (400 MHz, CDCl<sub>3</sub>): δ 7.72 (d, 2H, *J* = 8.8 Hz), 6.89 (d, 2H, *J* = 8.8 Hz), 6.17 (s, br, 1H), 3.84 (s, 3H), 3.43 (q, 2H, *J* = 6.8 Hz), 1.58-1.67 (m, 2H), 0.98 (t, 3H, *J* = 7.4 Hz); <sup>13</sup>C NMR (100 MHz, CDCl<sub>3</sub>): δ 167.1, 162.0, 128.6, 127.2, 113.7, 55.4, 41.7, 22.9, 11.4. GC-MS: m/z = 193.11.

4-chloro-*N*-propylbenzamide (**3p**)<sup>1</sup>

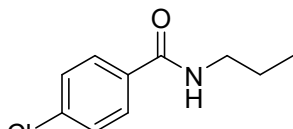

Eluent: petroleum ether/ethyl acetate (10:1). <sup>1</sup>H NMR (400 MHz, CDCl<sub>3</sub>): δ 7.71 (d, 2H, *J* = 6.8 Hz), 7.39 (d, 2H, *J* = 8.4 Hz), 6.12 (s, br, 1H), 3.43 (q, 2H, *J* = 6.4 Hz), 1.59-1.69 (m, 2H), 0.98 (t, 3H, *J* = 7.4 Hz); <sup>13</sup>C NMR (100 MHz, CDCl<sub>3</sub>): δ 166.5, 137.6, 133.2, 128.8, 128.3, 41.9, 22.9, 11.4. GC-MS: m/z = 197.06.

4-bromo-*N*-propylbenzamide (**3q**)<sup>1</sup>

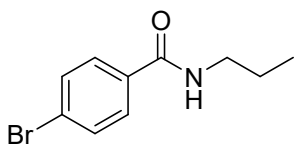

Eluent: petroleum ether/ethyl acetate (10:1).  $^1\text{H}$  NMR (400 MHz,  $\text{CDCl}_3$ ):  $\delta$  7.62 (d, 2H,  $J = 8.8$  Hz), 7.55 (d, 2H,  $J = 8.4$  Hz), 6.16 (s, br, 1H), 3.42 (q, 2H,  $J = 6.4$  Hz), 1.59-1.68 (m, 2H), 0.98 (t, 3H,  $J = 7.4$  Hz);  $^{13}\text{C}$  NMR (100 MHz,  $\text{CDCl}_3$ ):  $\delta$  166.6, 133.7, 131.8, 128.5, 125.9, 41.8, 22.9, 11.4. GC-MS:  $m/z = 241.01$ .

4-nitro-*N*-propylbenzamide (**3r**)<sup>1</sup>

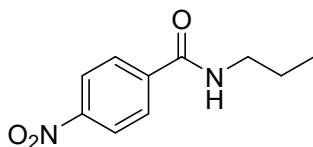

Eluent: petroleum ether/ethyl acetate (2:1).  $^1\text{H}$  NMR (400 MHz,  $\text{CDCl}_3$ ):  $\delta$  8.27 (d, 2H,  $J = 8.8$  Hz), 7.92 (d, 2H,  $J = 8.8$  Hz), 6.25 (s, br, 1H), 3.44 (q, 2H,  $J = 6.4$  Hz), 1.63-1.72 (m, 2H), 1.00 (t, 3H,  $J = 7.4$  Hz);  $^{13}\text{C}$  NMR (100 MHz,  $\text{CDCl}_3$ ):  $\delta$  165.5, 149.6, 140.4, 128.1, 123.8, 42.1, 22.8, 11.4. GC-MS:  $m/z = 208.08$ .

*N*-propylthiophene-2-carboxamide (**3s**)<sup>4</sup>

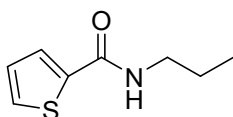

Eluent: petroleum ether/ethyl acetate (10:1).  $^1\text{H}$  NMR (400 MHz,  $\text{CDCl}_3$ ):  $\delta$  7.49 (dd, 1H,  $J = 1.2$  Hz,  $J = 1.2$  Hz), 7.44 (dd, 1H,  $J = 1.2$  Hz,  $J = 1.2$  Hz), 7.06 (dd, 1H,  $J = 3.6$  Hz,  $J = 3.6$  Hz), 6.06 (s, br, 1H), 3.44 (q, 2H,  $J = 7.2$  Hz), 1.59-1.69 (m, 2H), 0.98 (t, 3H,  $J = 7.4$  Hz);  $^{13}\text{C}$  NMR (100 MHz,  $\text{CDCl}_3$ ):  $\delta$  161.9, 139.2, 129.6, 127.8, 127.6, 41.7, 22.9, 11.4. GC-MS:  $m/z = 169.05$ .

*N*-propylnicotinamide (**3t**)<sup>4</sup>

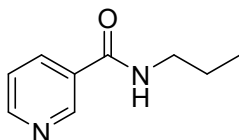

Eluent: petroleum ether/ethyl acetate (10:1).  $^1\text{H}$  NMR (400 MHz,  $\text{CDCl}_3$ ):  $\delta$  8.53 (d, 1H,  $J = 4.8$  Hz), 8.19 (d, 1H,  $J = 6.8$  Hz), 8.12 (s, br, 1H), 7.83 (t, 1H,  $J = 7.6$  Hz), 7.40 (t, 1H,  $J = 6.4$  Hz), 3.44 (q, 2H,  $J = 7.0$  Hz), 1.62-1.71 (m, 2H), 0.98 (t, 3H,  $J = 7.4$  Hz);  $^{13}\text{C}$  NMR (100 MHz,  $\text{CDCl}_3$ ):  $\delta$  164.2, 150.1, 147.9, 137.2, 125.9, 122.1, 41.1, 22.9, 11.4. GC-MS:  $m/z = 164.09$ .

*N*-propyl-2-naphthamide (**3u**)<sup>1</sup>

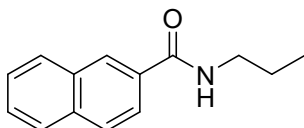

Eluent: petroleum ether/ethyl acetate (10:1).  $^1\text{H}$  NMR (400 MHz,  $\text{CDCl}_3$ ):  $\delta$  7.84 (d, 3H,  $J = 8.0$  Hz), 7.96 (s, 1H), 7.51-7.54 (m, 2H), 7.46 (t, 1H,  $J = 8.4$  Hz), 6.17 (s, br, 1H), 3.42 (q, 2H,  $J = 7.2$  Hz), 1.59-1.69 (m, 2H), 0.99 (t, 3H,  $J = 7.4$  Hz);  $^{13}\text{C}$  NMR (100 MHz,  $\text{CDCl}_3$ ):  $\delta$  166.6, 136.9, 136.8, 134.8, 132.2, 129.5, 129.2, 128.7, 128.4, 127.9, 127.5, 122.4, 41.9, 22.9, 11.5. GC-MS:  $m/z = 231.11$ .

3-chloro-*N*-propylbenzamide (**3v**)<sup>5</sup>

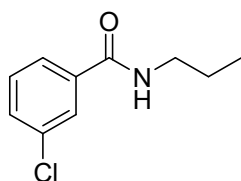

Eluent: petroleum ether/ethyl acetate (10:1).  $^1\text{H}$  NMR (400 MHz,  $\text{CDCl}_3$ ):  $\delta$  8.00 (s, 1H), 7.93 (dd, 1H,  $J = 2.0$  Hz,  $J = 8.0$  Hz), 7.53 (d, 1H,  $J = 9.2$  Hz), 7.38 (d, 1H,  $J = 8.0$  Hz), 6.05 (s, br, 1H), 3.75 (q, 2H,  $J = 7.4$  Hz), 1.76-1.85 (m, 2H), 1.06 (t, 3H,  $J = 7.4$  Hz);  $^{13}\text{C}$  NMR (100 MHz,  $\text{CDCl}_3$ ):  $\delta$  166.7, 135.6, 134.4, 133.6, 130.5, 129.4, 128.9, 47.0, 21.2, 11.5. GC-MS:  $m/z = 197.06$ .

2-chloro-*N*-propylbenzamide (**3w**)<sup>5</sup>

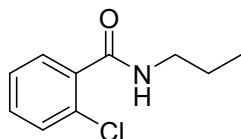

(Colourless viscous liquid) Eluent: petroleum ether/ethyl acetate (10:1).  $^1\text{H}$  NMR (400 MHz,  $\text{CDCl}_3$ ):  $\delta$  7.31 (d, 1H,  $J = 8.0$  Hz), 7.19 (t, 1H,  $J = 8.4$  Hz), 6.67 (t, 2H,  $J = 8.0$  Hz), 6.04 (s, br, 1H), 3.39 (q, 2H,  $J = 6.6$  Hz), 1.59-1.66 (m, 2H), 0.99 (t, 3H,  $J = 7.4$  Hz);  $^{13}\text{C}$  NMR (100 MHz,  $\text{CDCl}_3$ ):  $\delta$  166.6, 137.3, 133.7, 131.6, 131.4, 131.3, 128.3, 45.1, 22.9, 11.1. GC-MS:  $m/z = 197.06$ .

## 4. References

- [1] H. Yang, W. Hu, S. Deng, T. Wu, H. Cen, Y. Chen, D. Zhang, B. Wang, *New J. Chem.*, **2015**, 39, 5912-5915
- [2] Y. Wang, G. Zhang, A. Shoberu, J. Zou, *Tetrahedron Lett.*, **2021**, 80, 153316.
- [3] X. Cui, Z. Qiao, X. Huang, X. Yang, X. Chen, S. Sun, *Studies in Synthetic Chemistry*, **2018**, 6, 8-14.
- [4] J. W. Bean, D. J. Nelson, G. E. Wright, *Biochemical Pharmacology*, **1986**, 6, 1011-1017.
- [5] M. Y. Bhat, S. Ahmed, Q. N. Ahmed, *J. Org. Chem.*, **2022**, 87, 11608-11624.

## 5. Copies of $^1\text{H}$ and $^{13}\text{C}$ NMR spectra

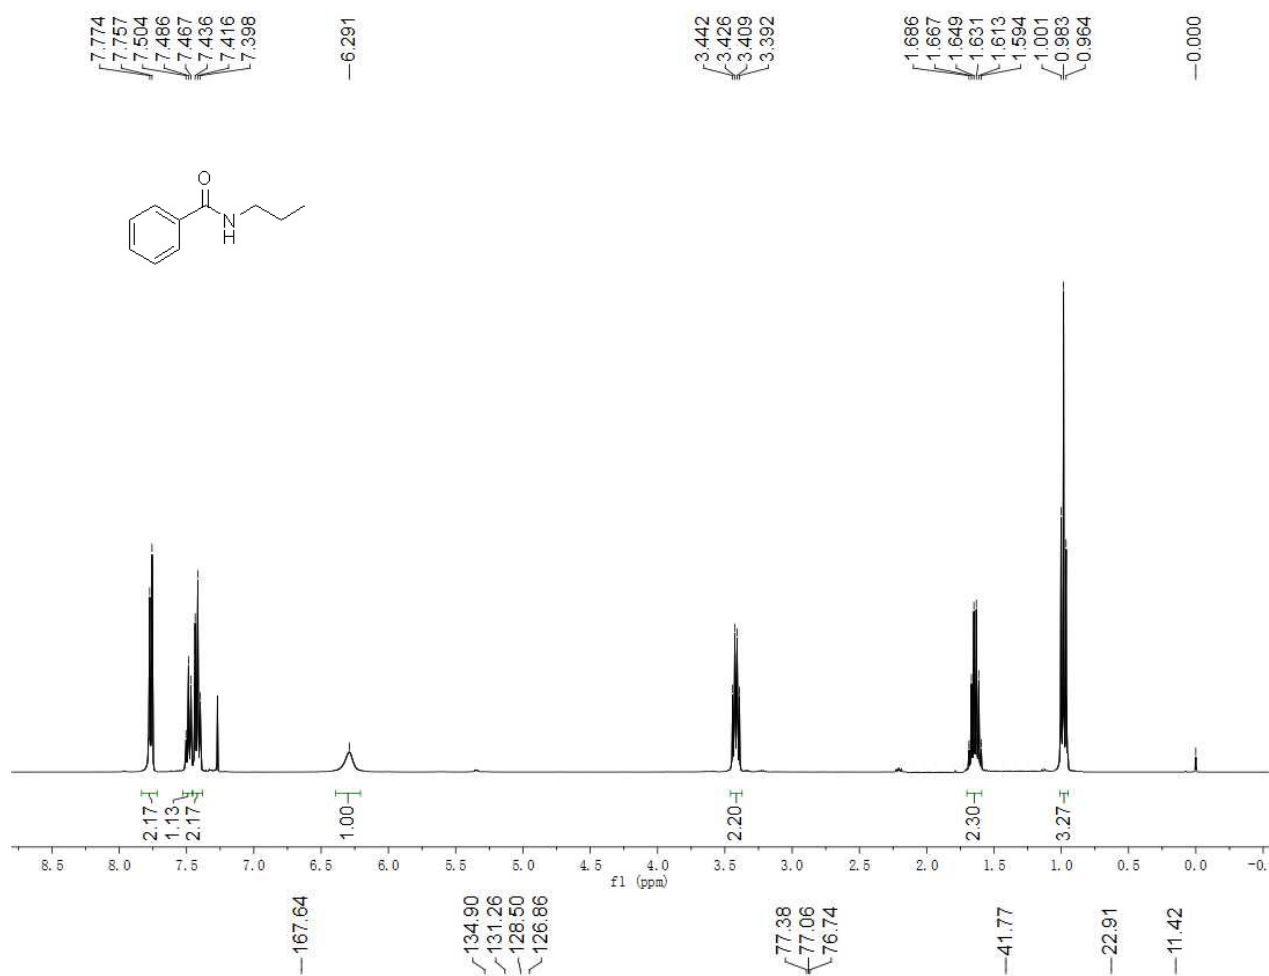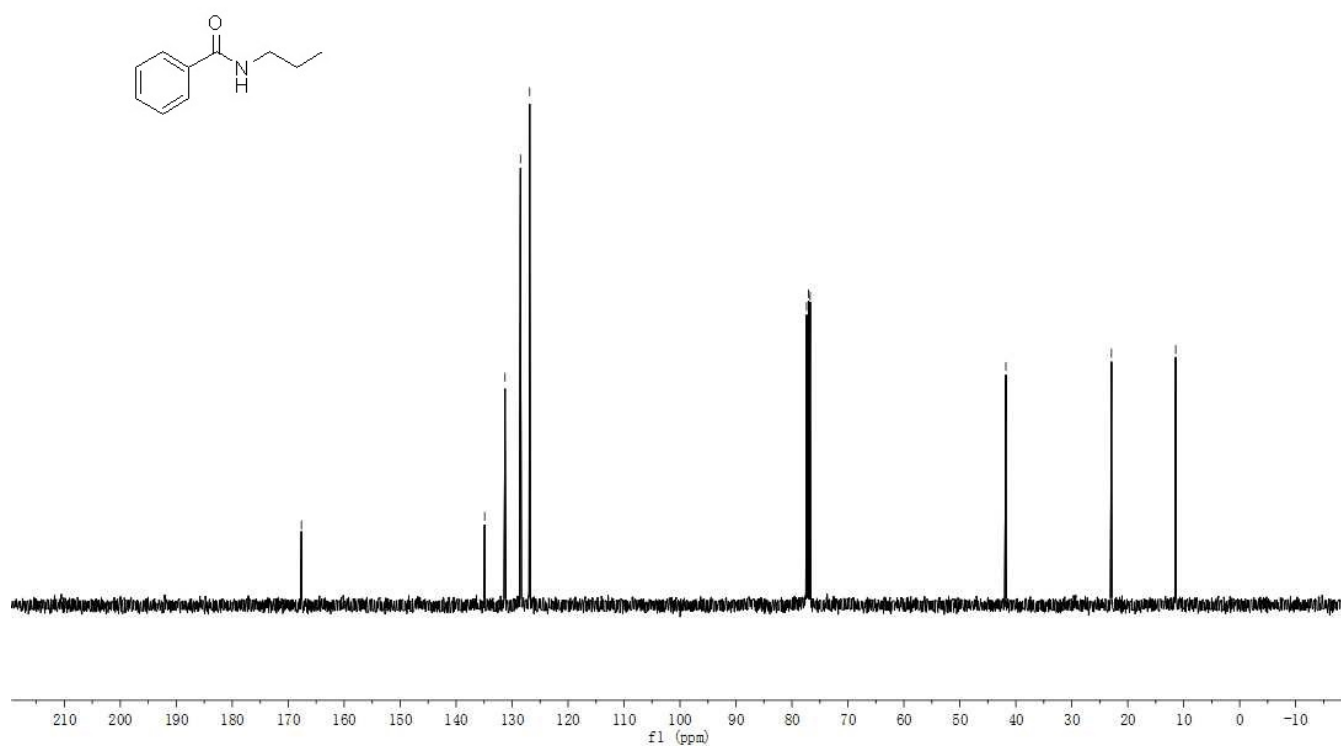



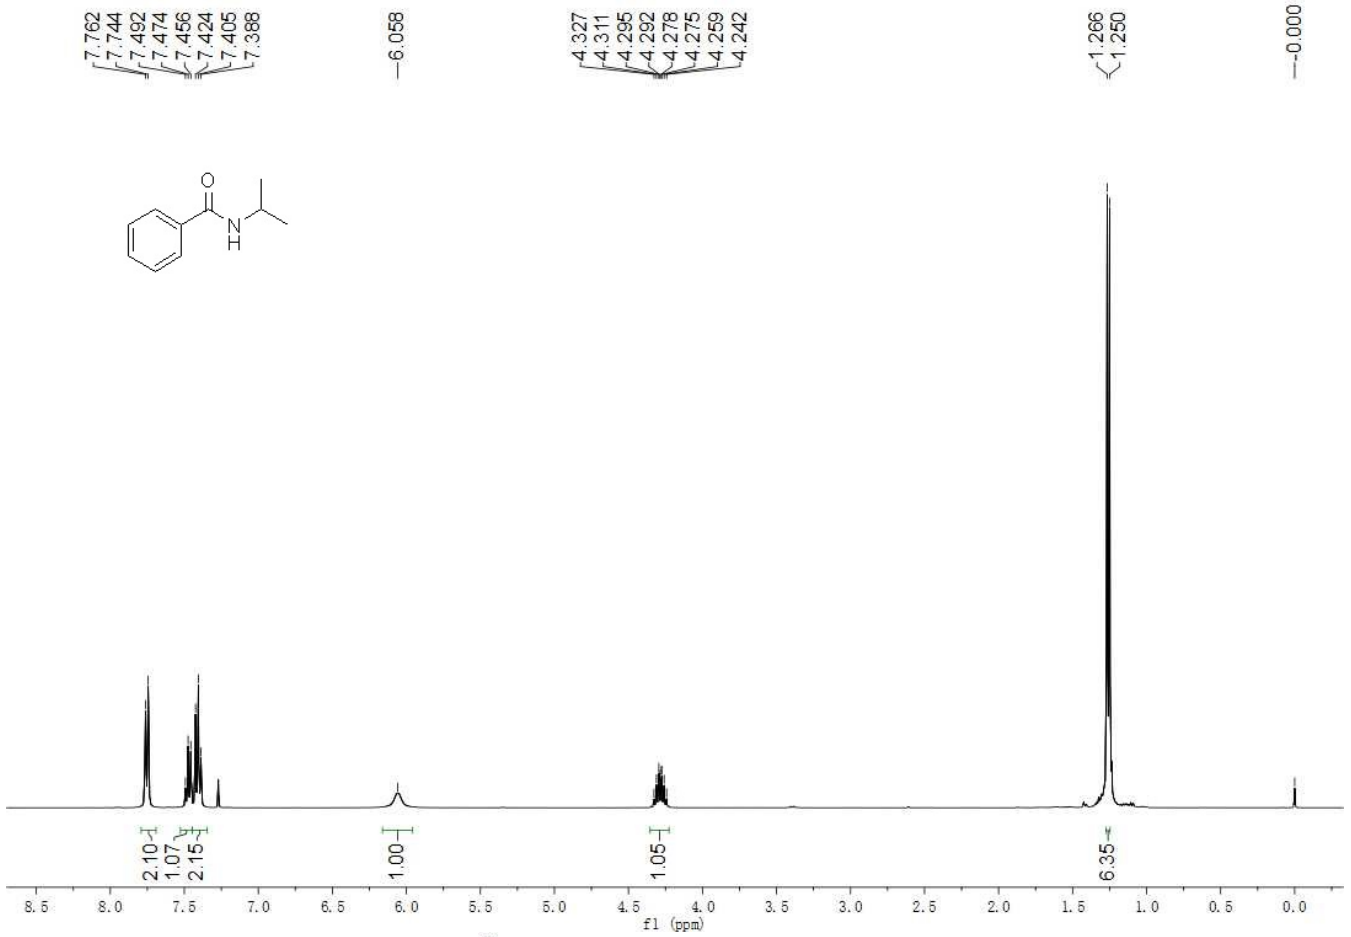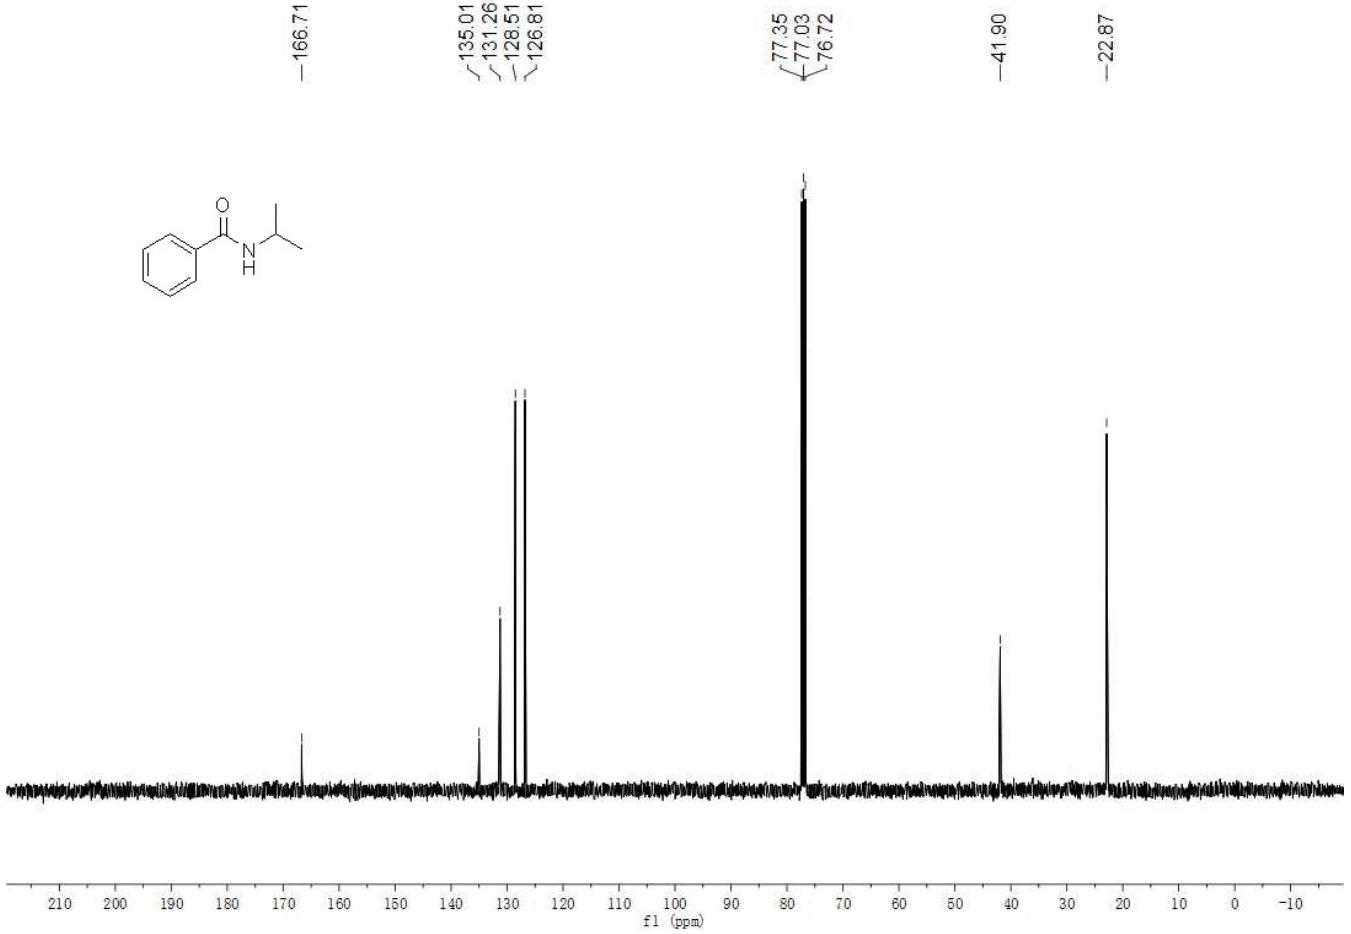

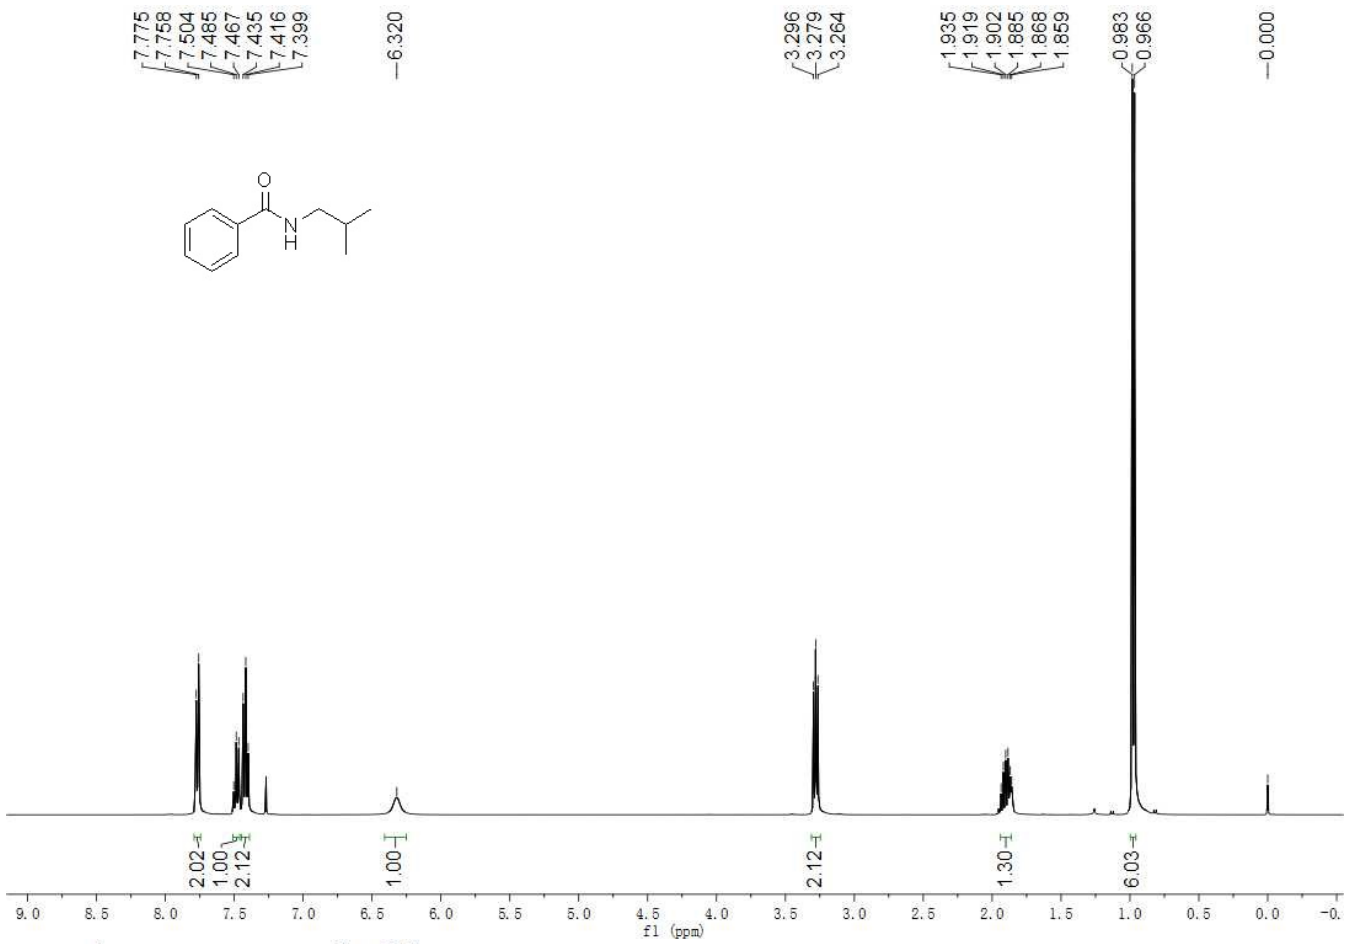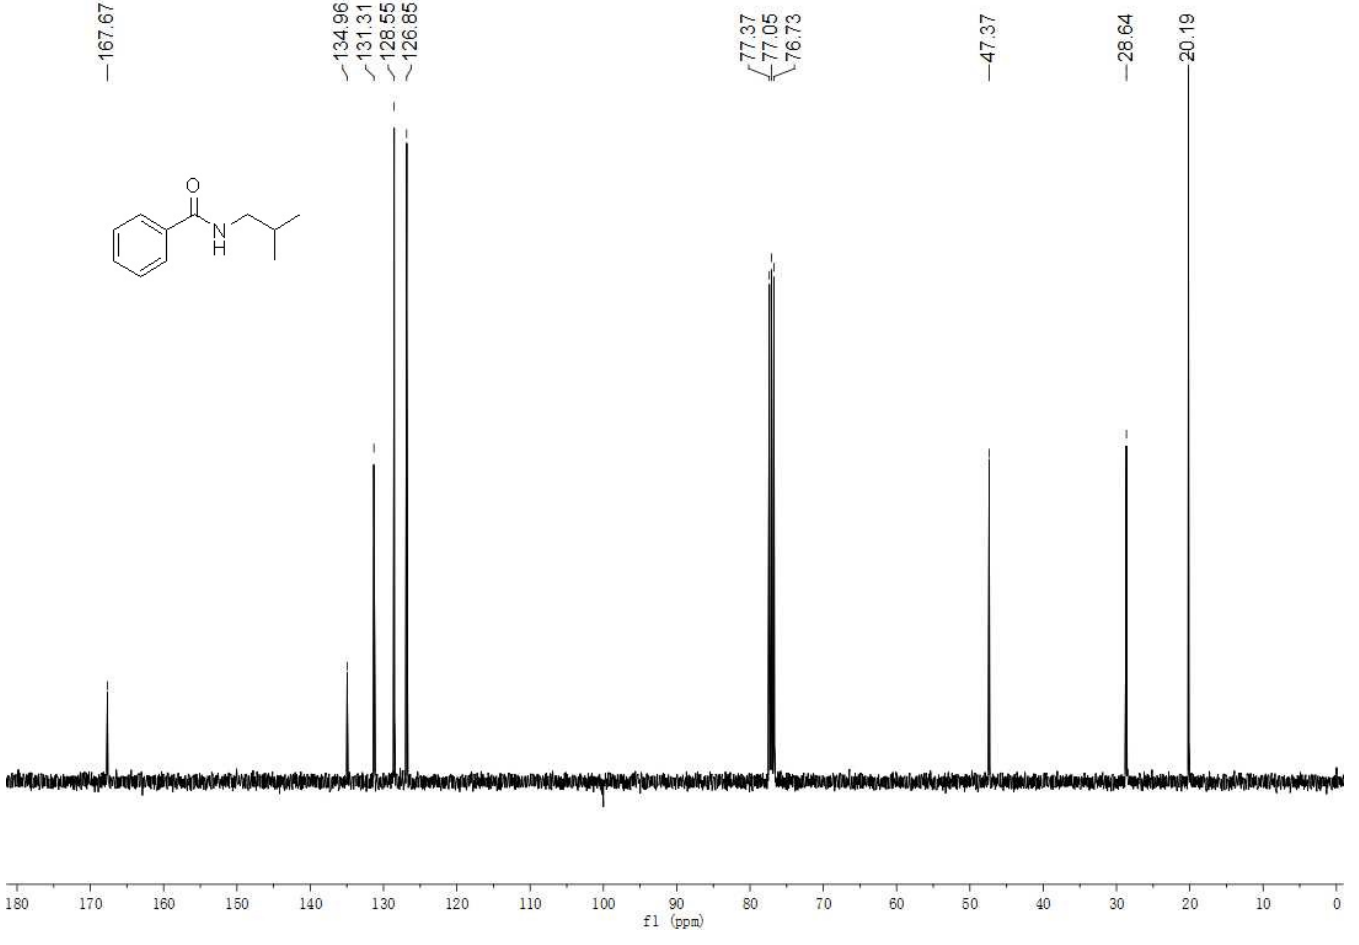

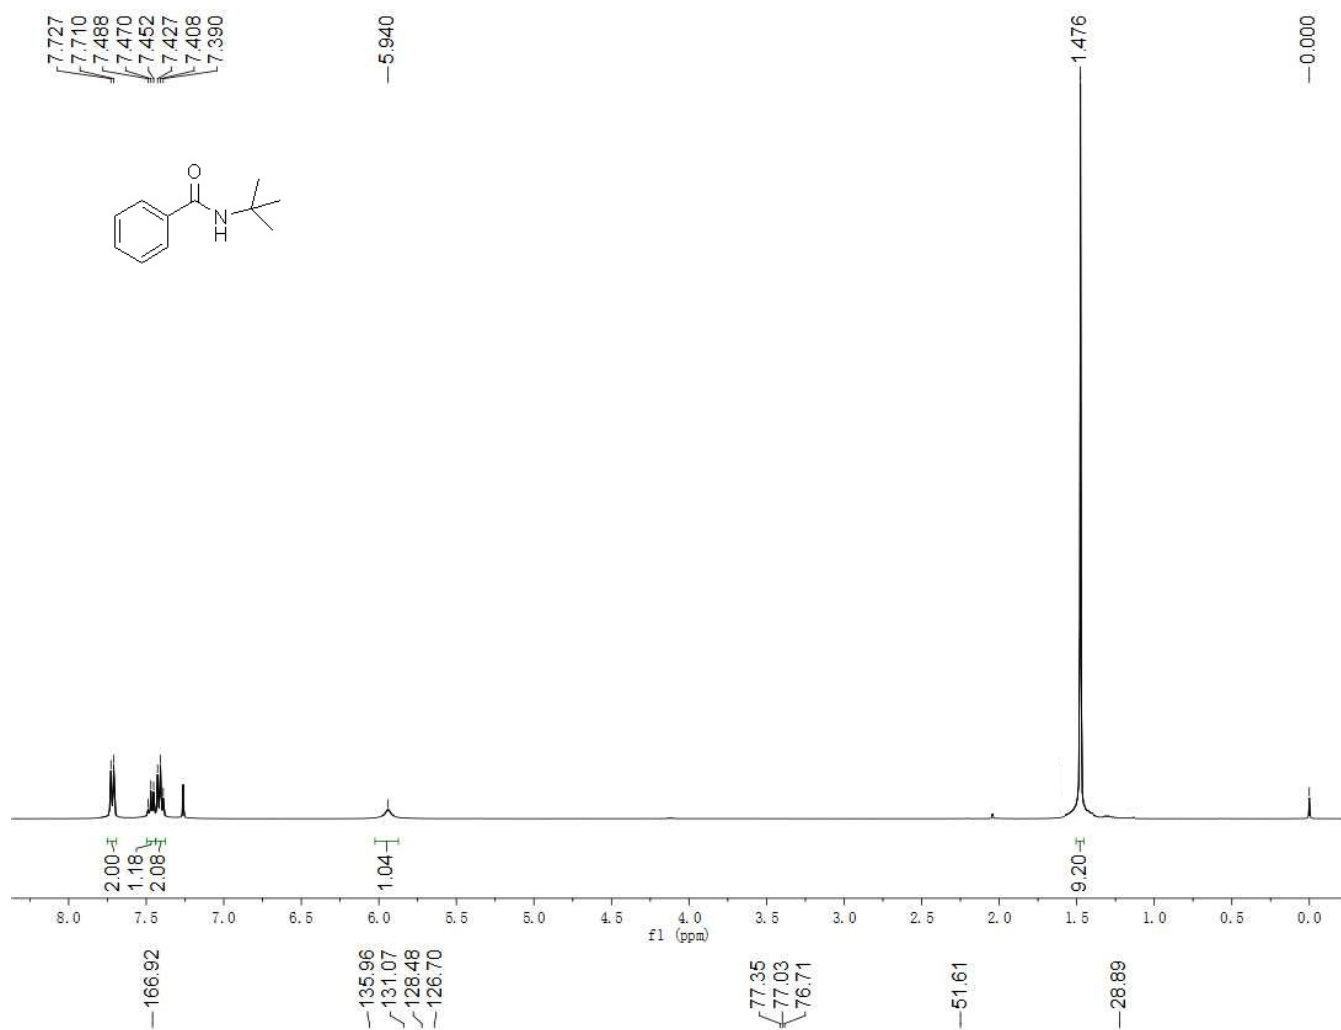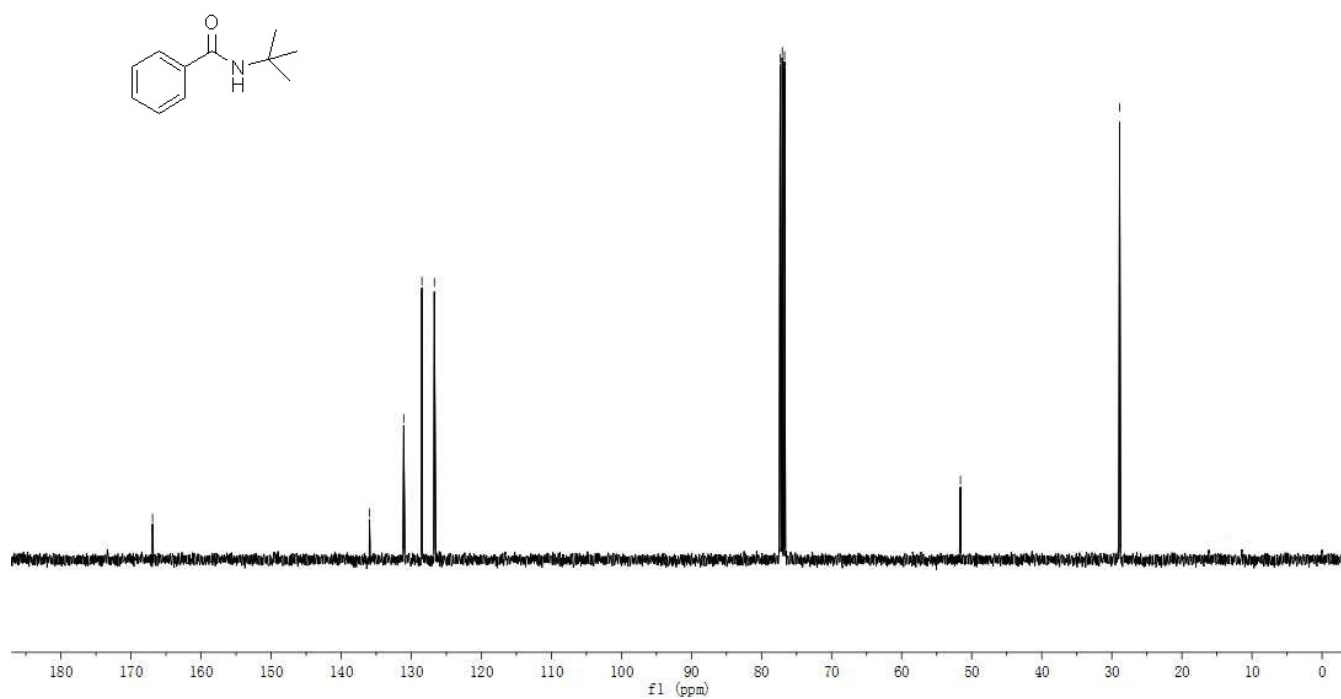

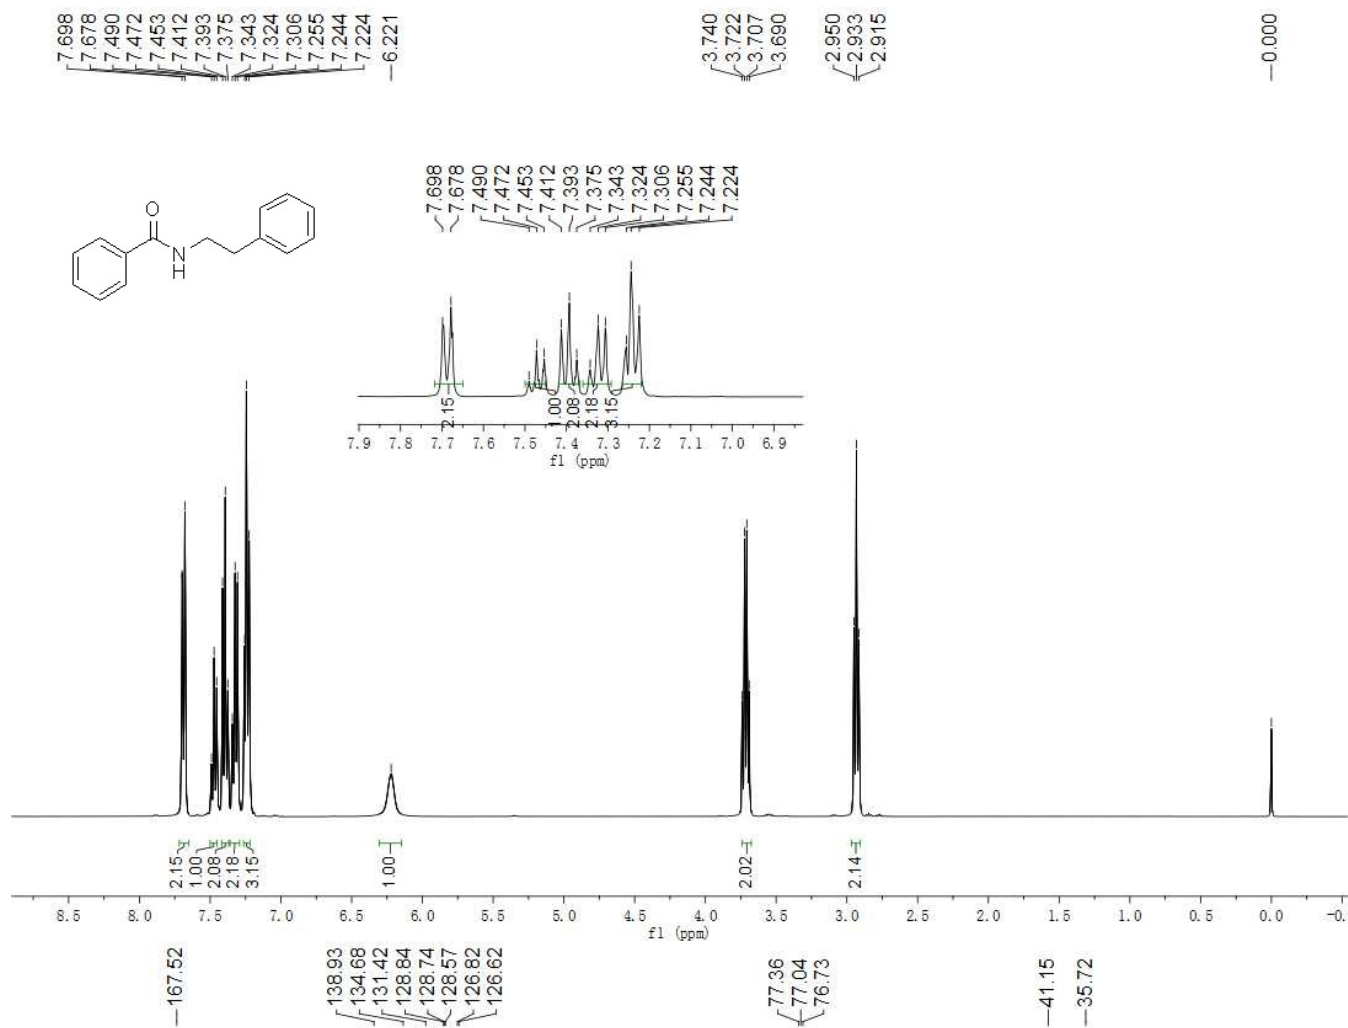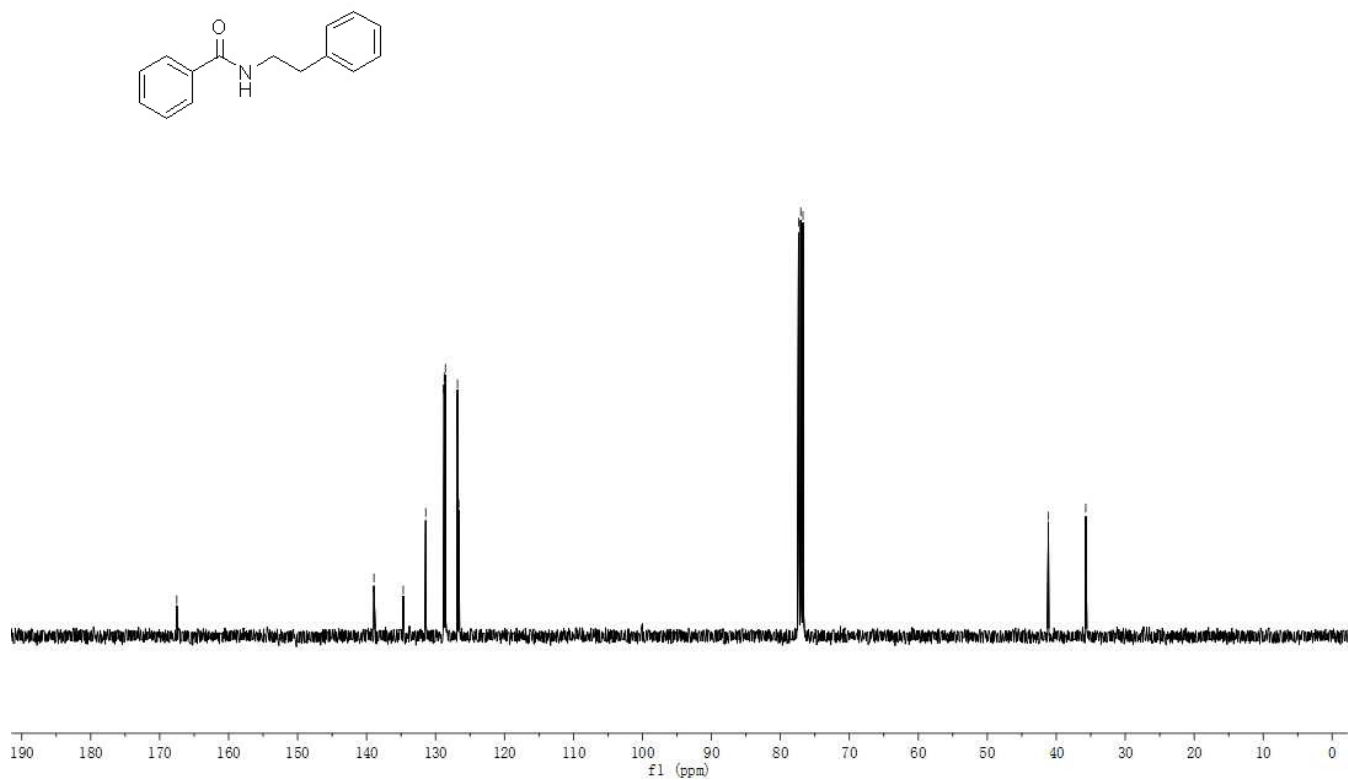

7.803  
7.782  
7.544  
7.526  
7.510  
7.471  
7.451  
7.434  
-6.580

3.827  
3.814  
3.798  
3.760  
3.747  
3.735

-0.000

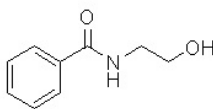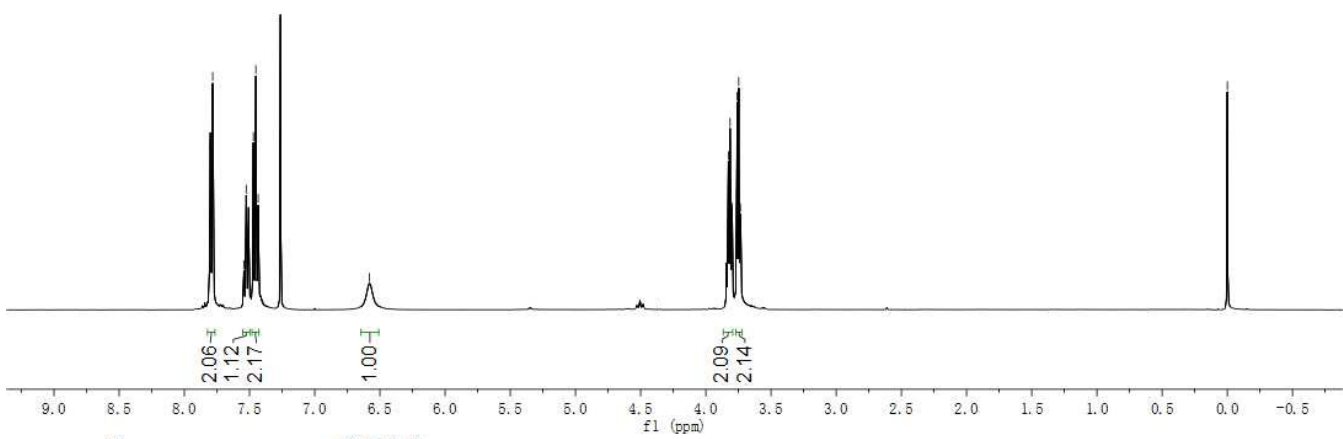

-167.65

134.10  
131.78  
128.68  
126.98

77.34  
77.02  
76.71

44.19  
41.68

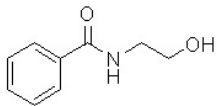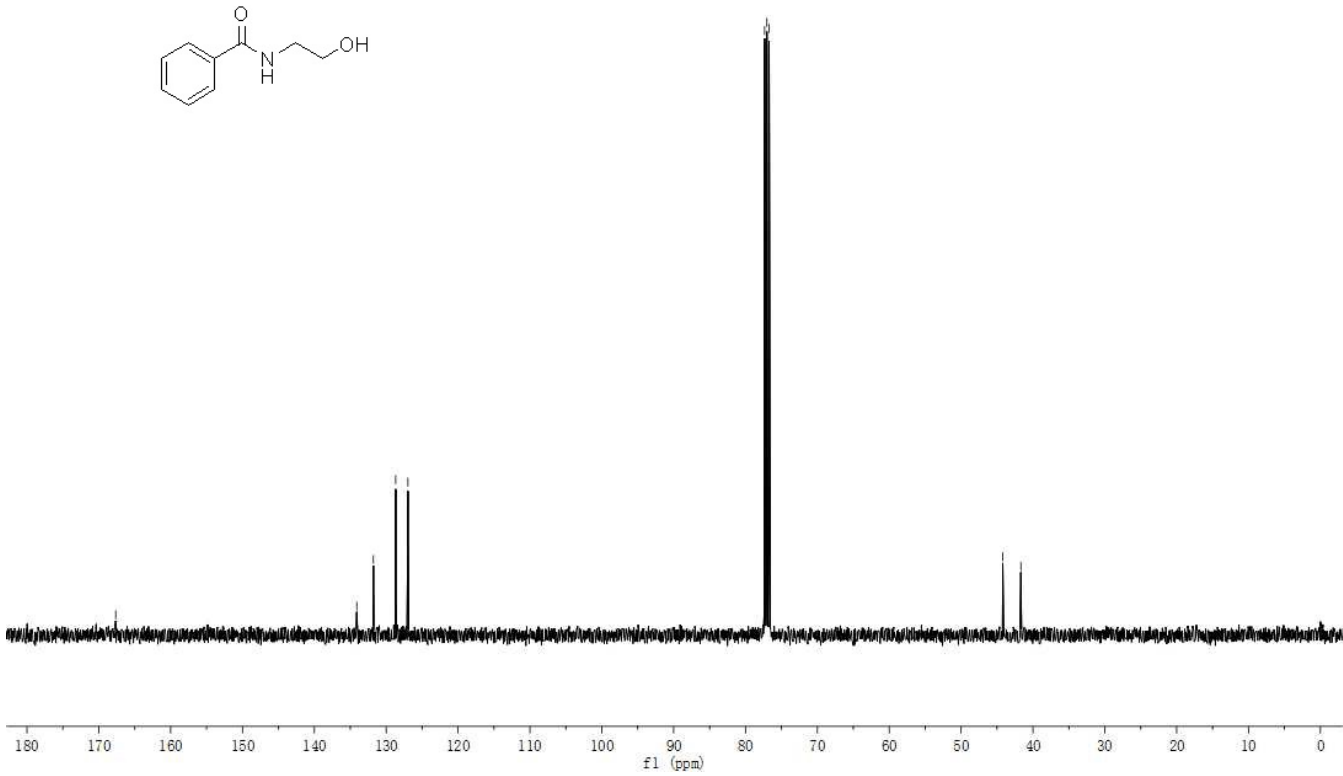

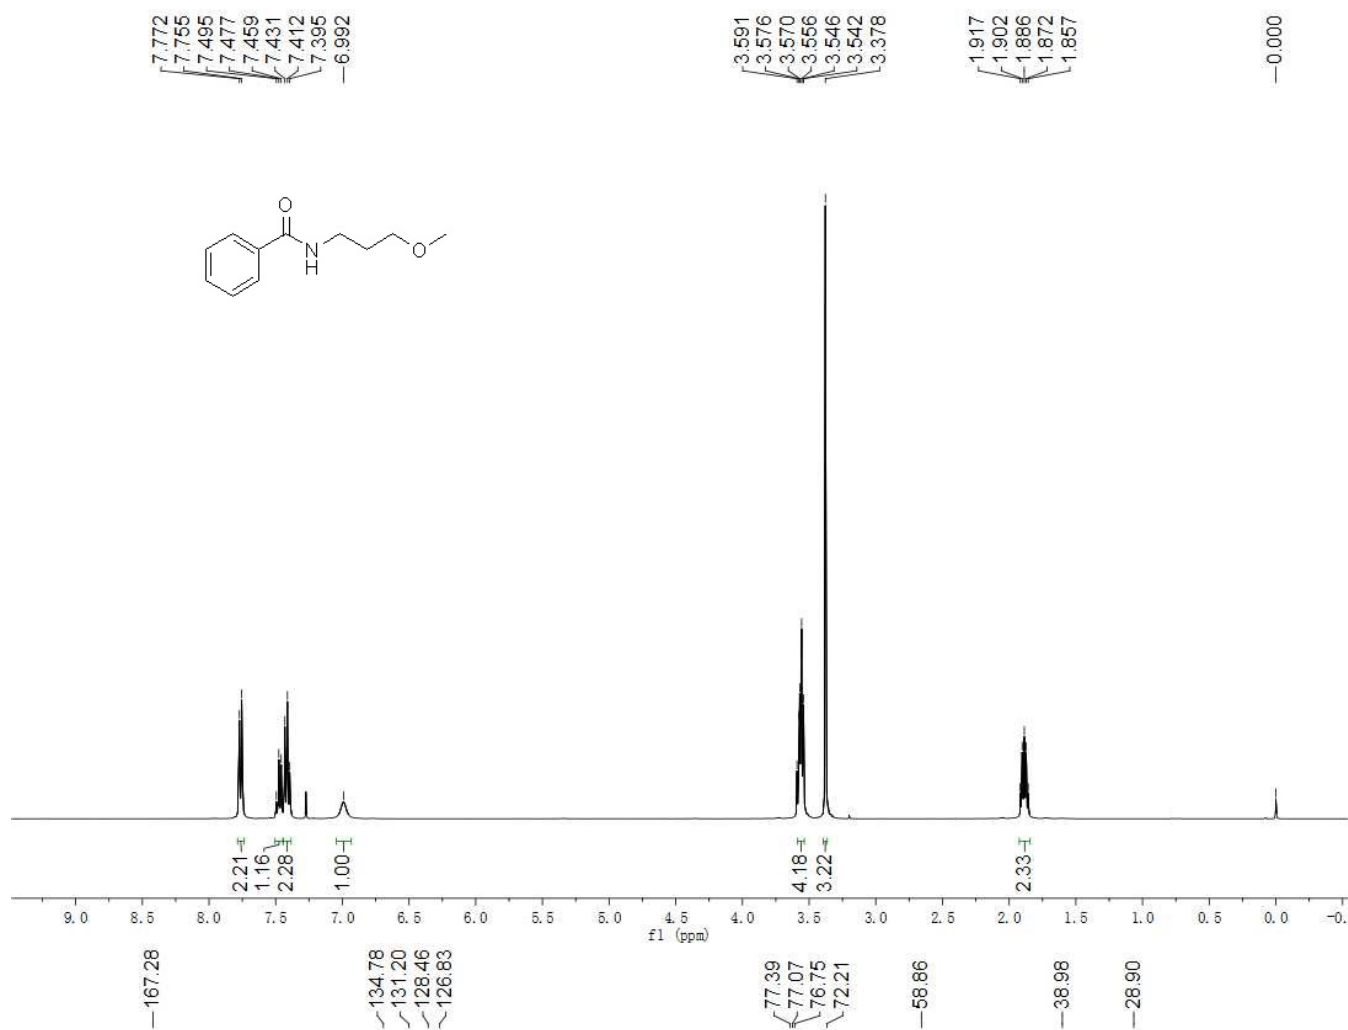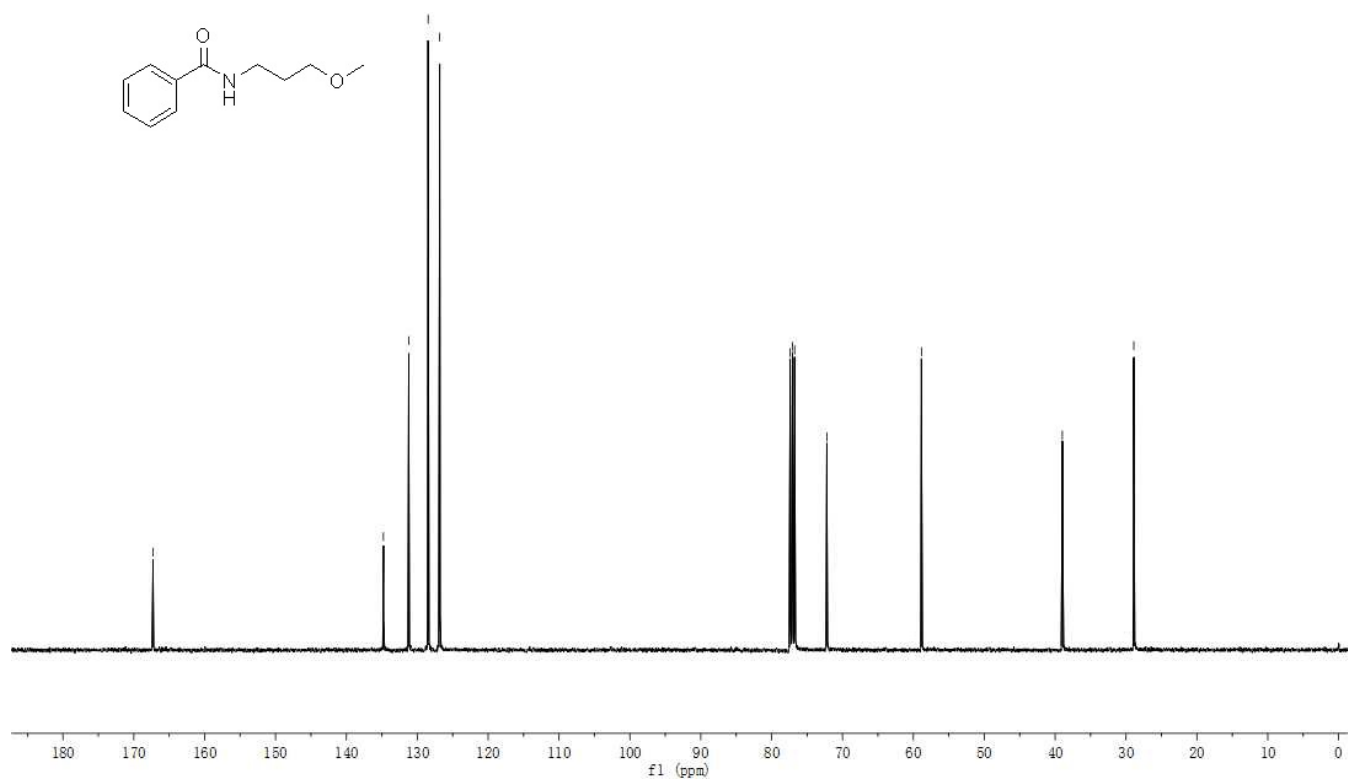

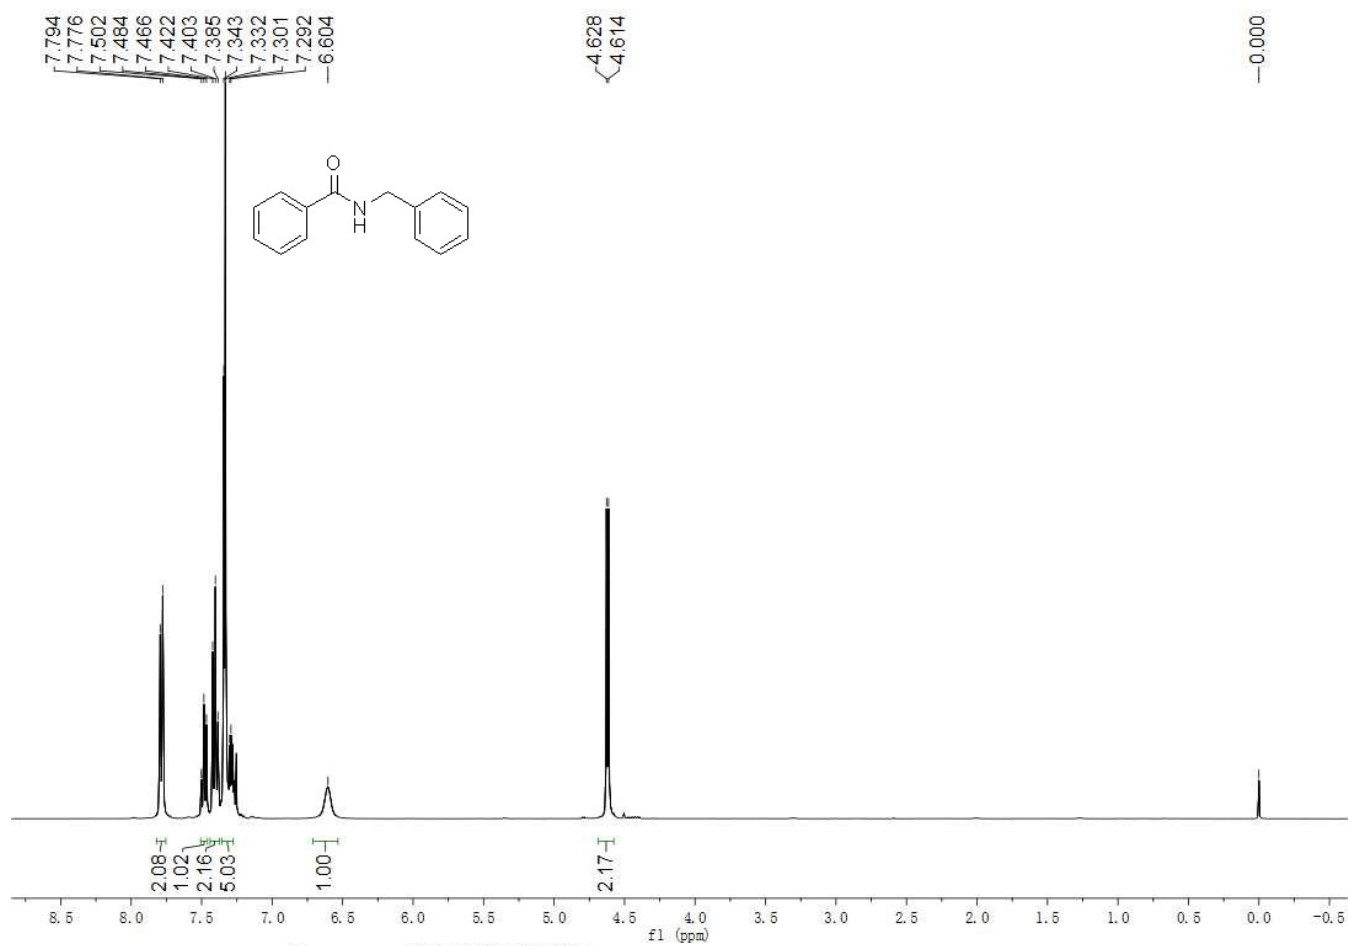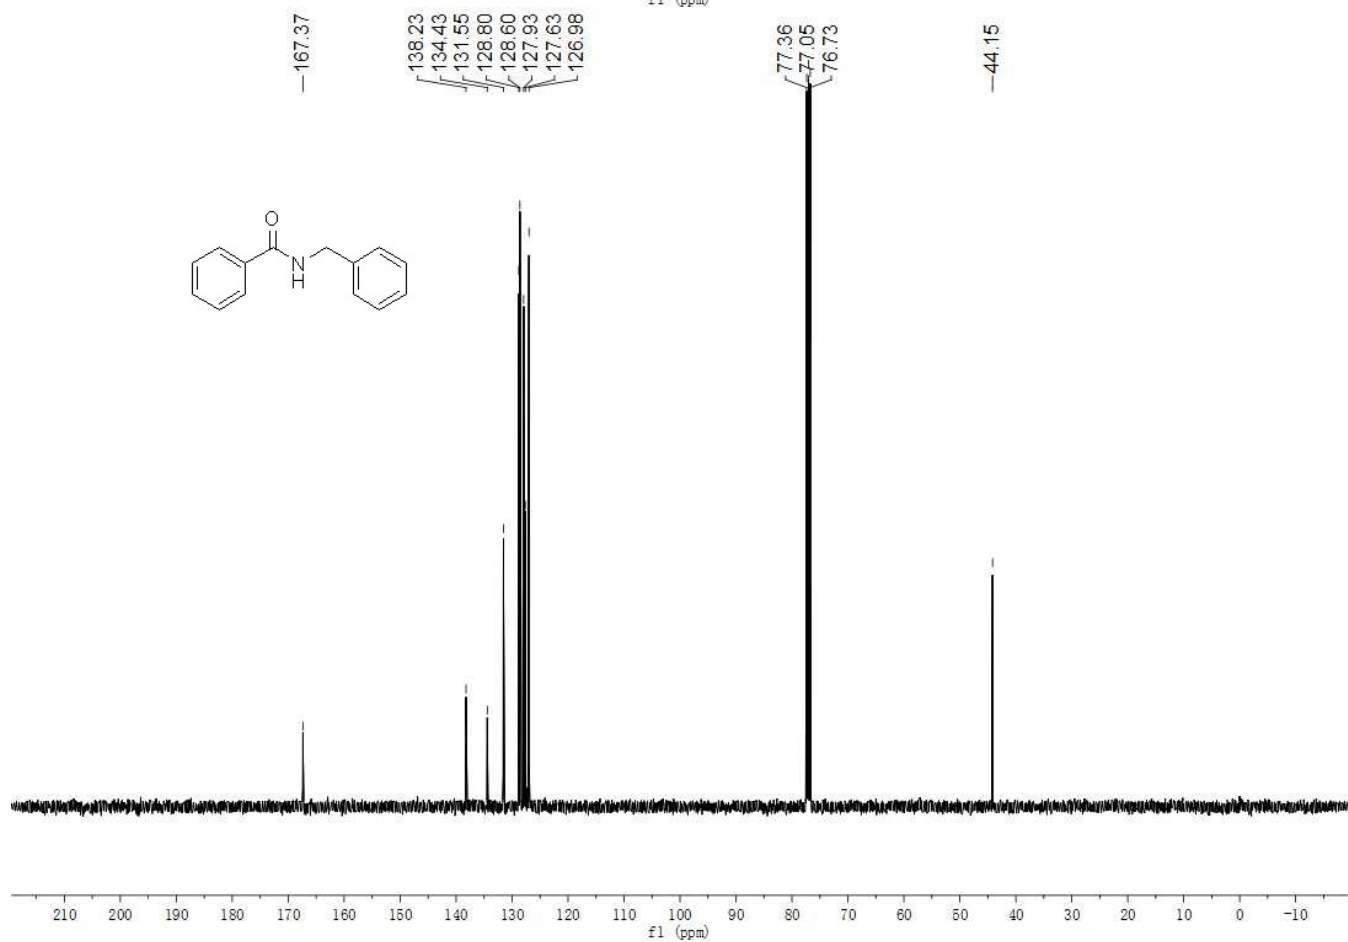

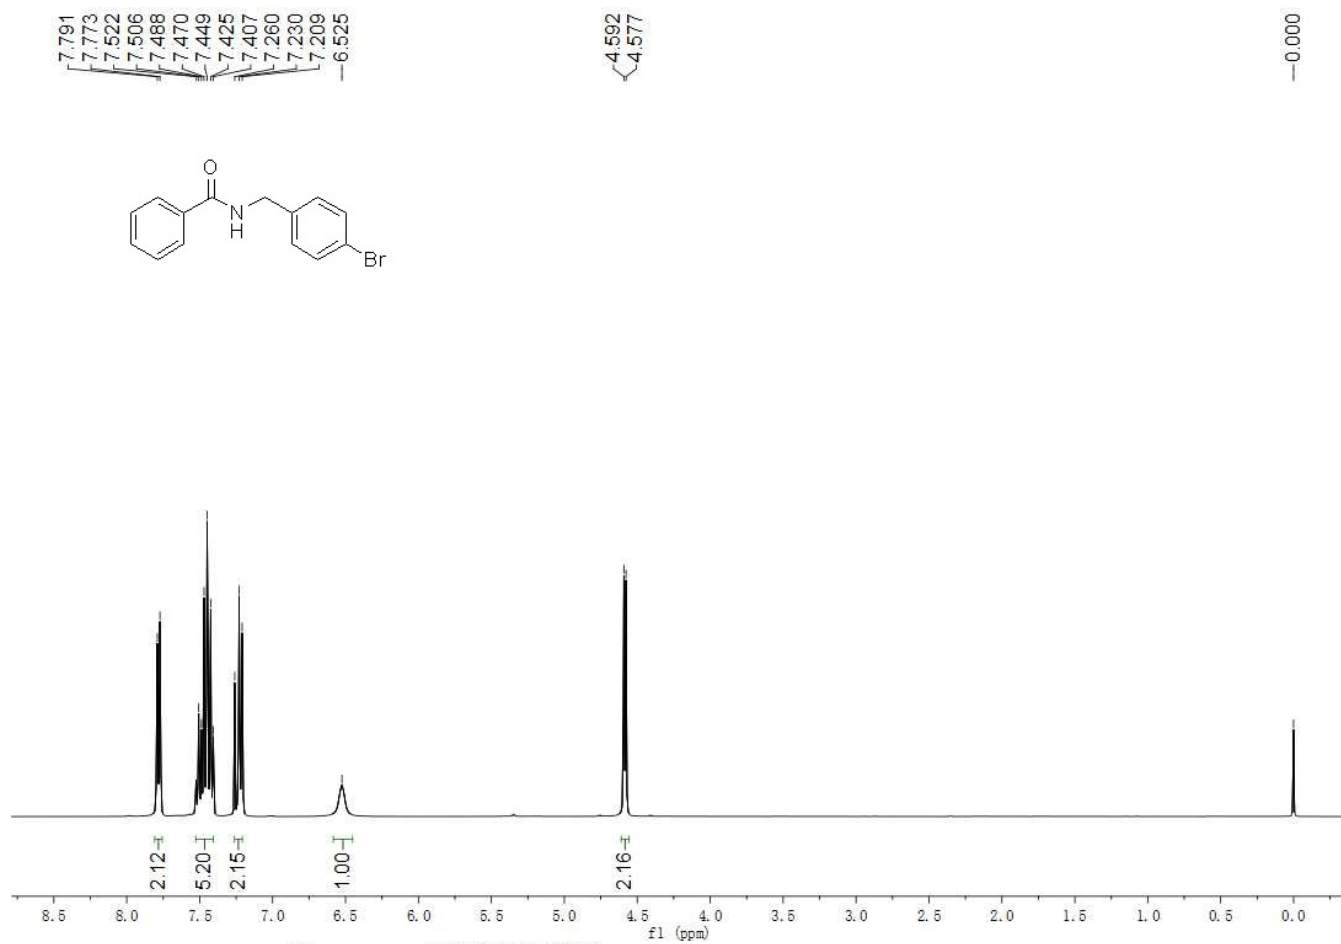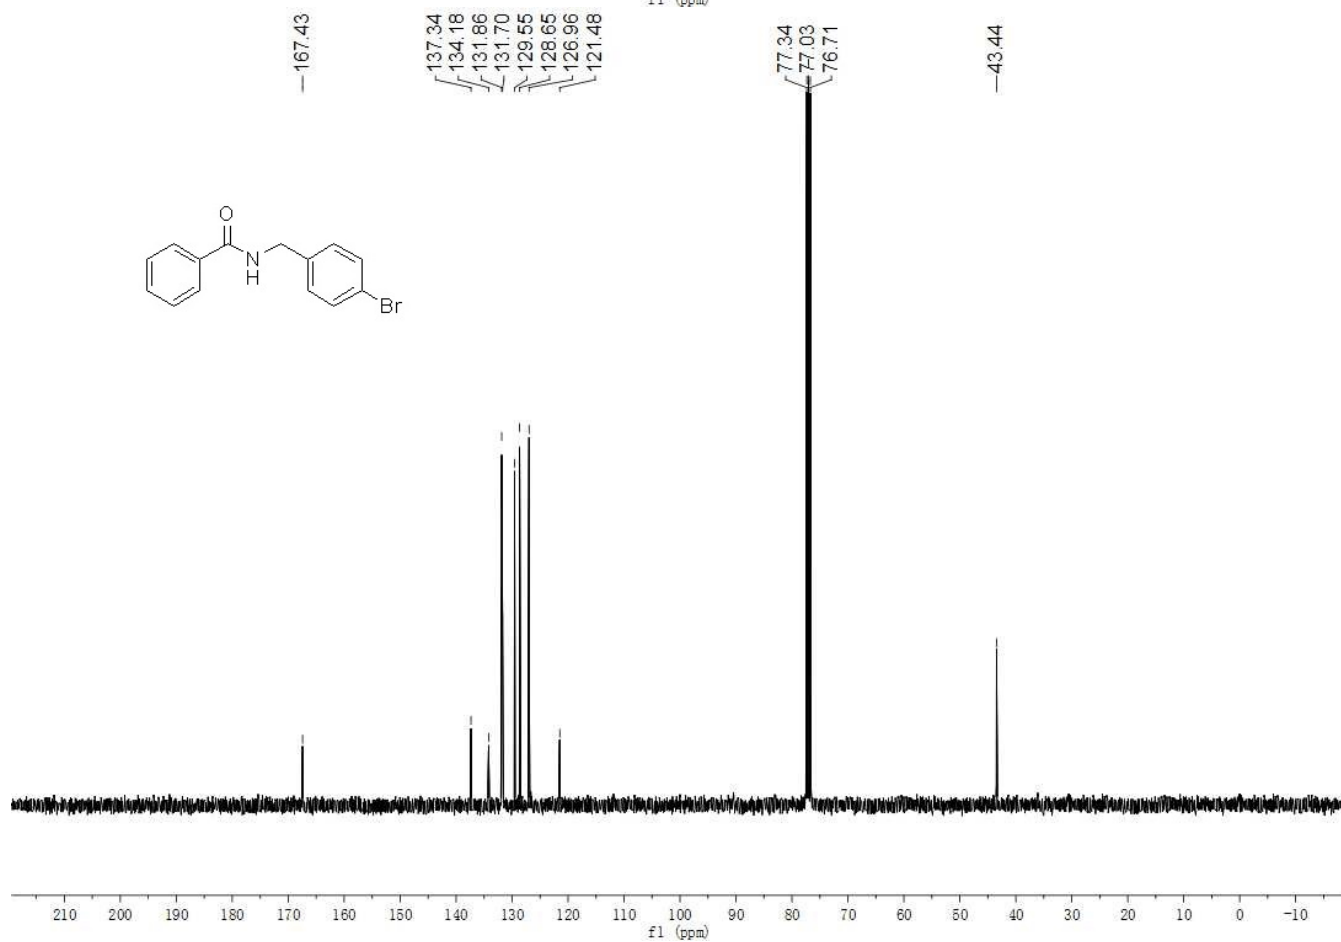



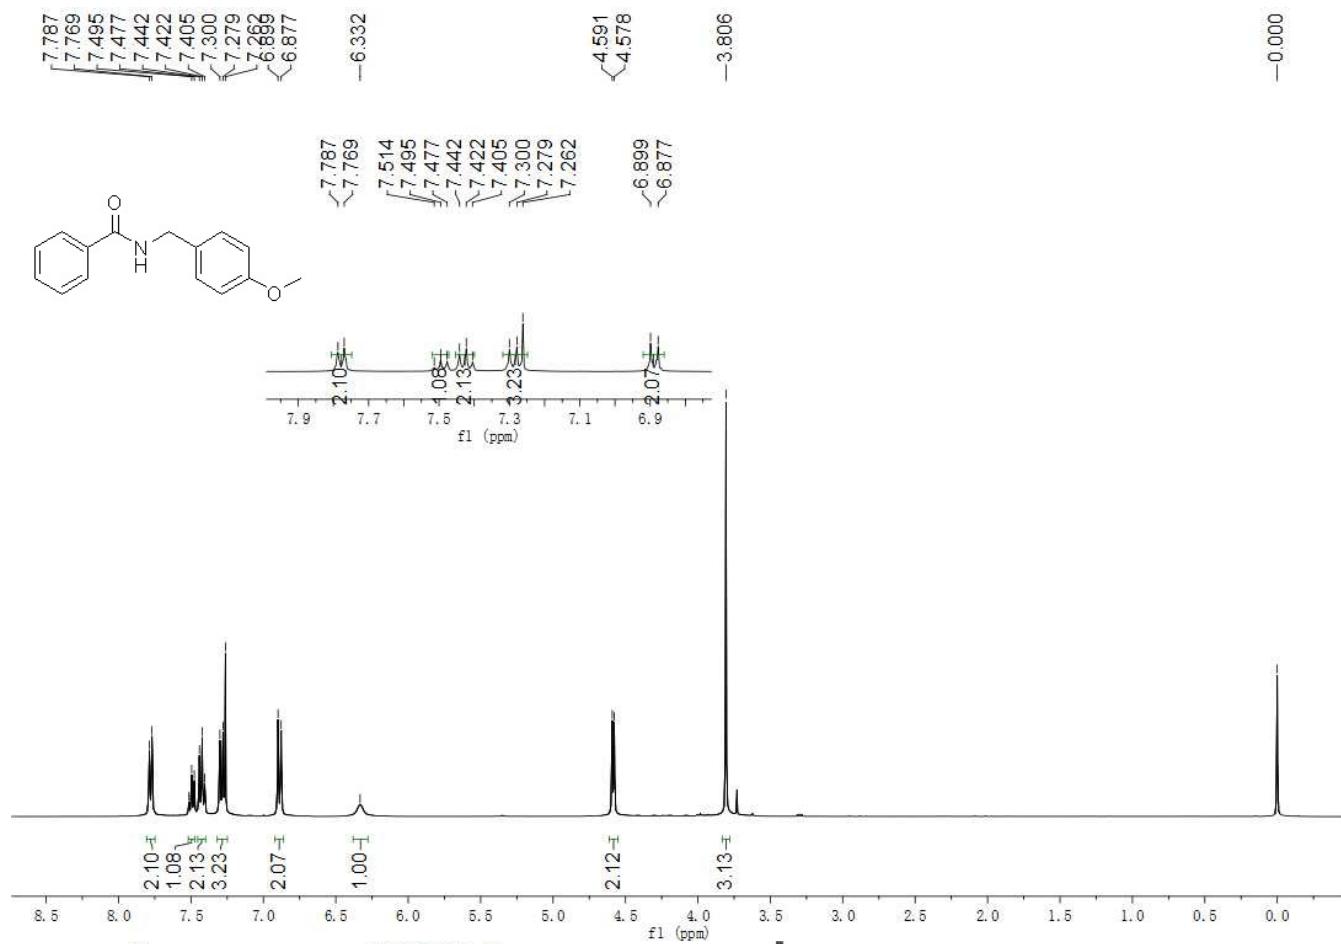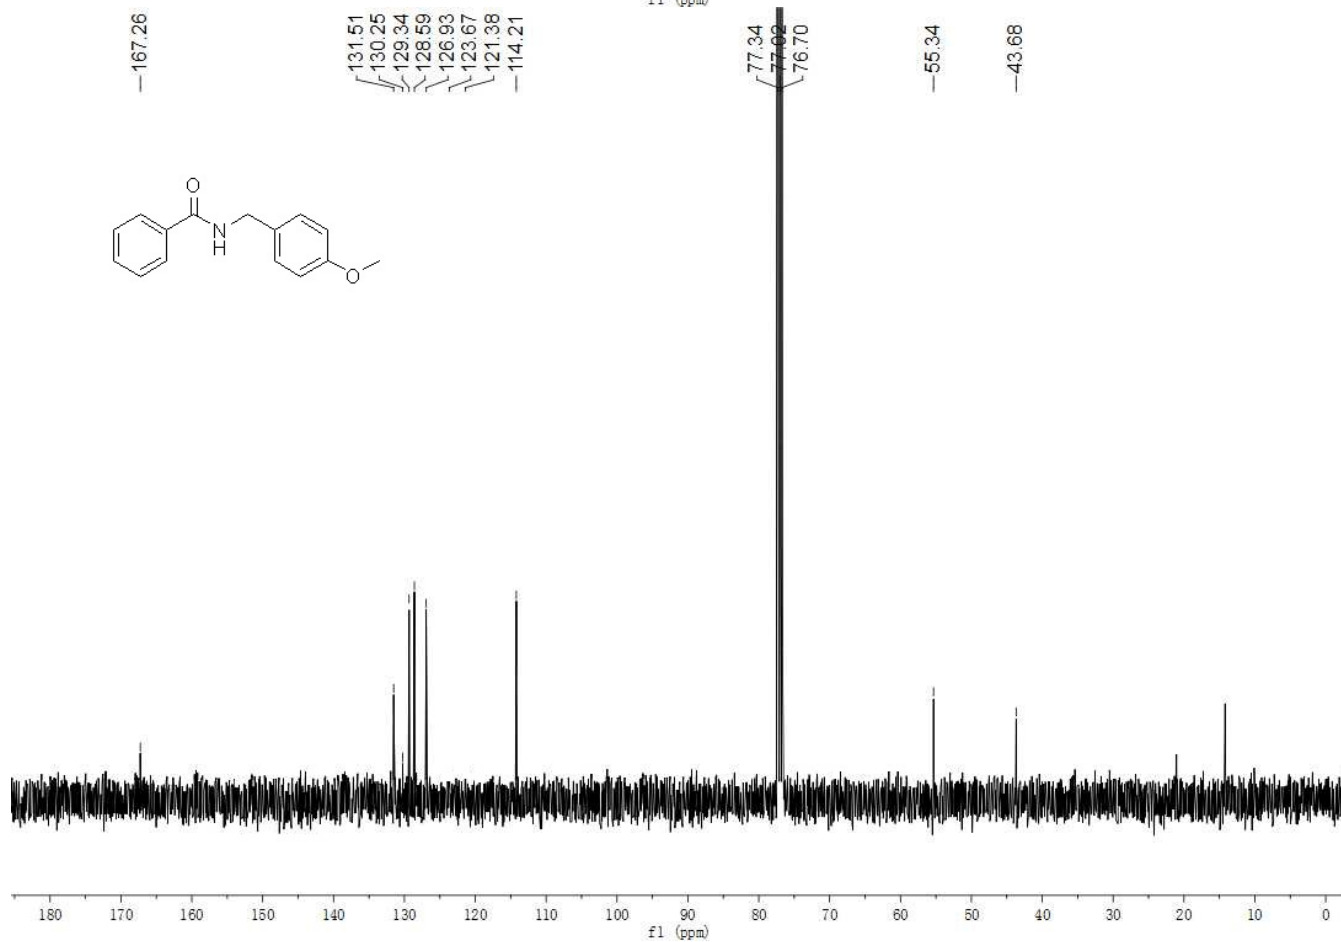

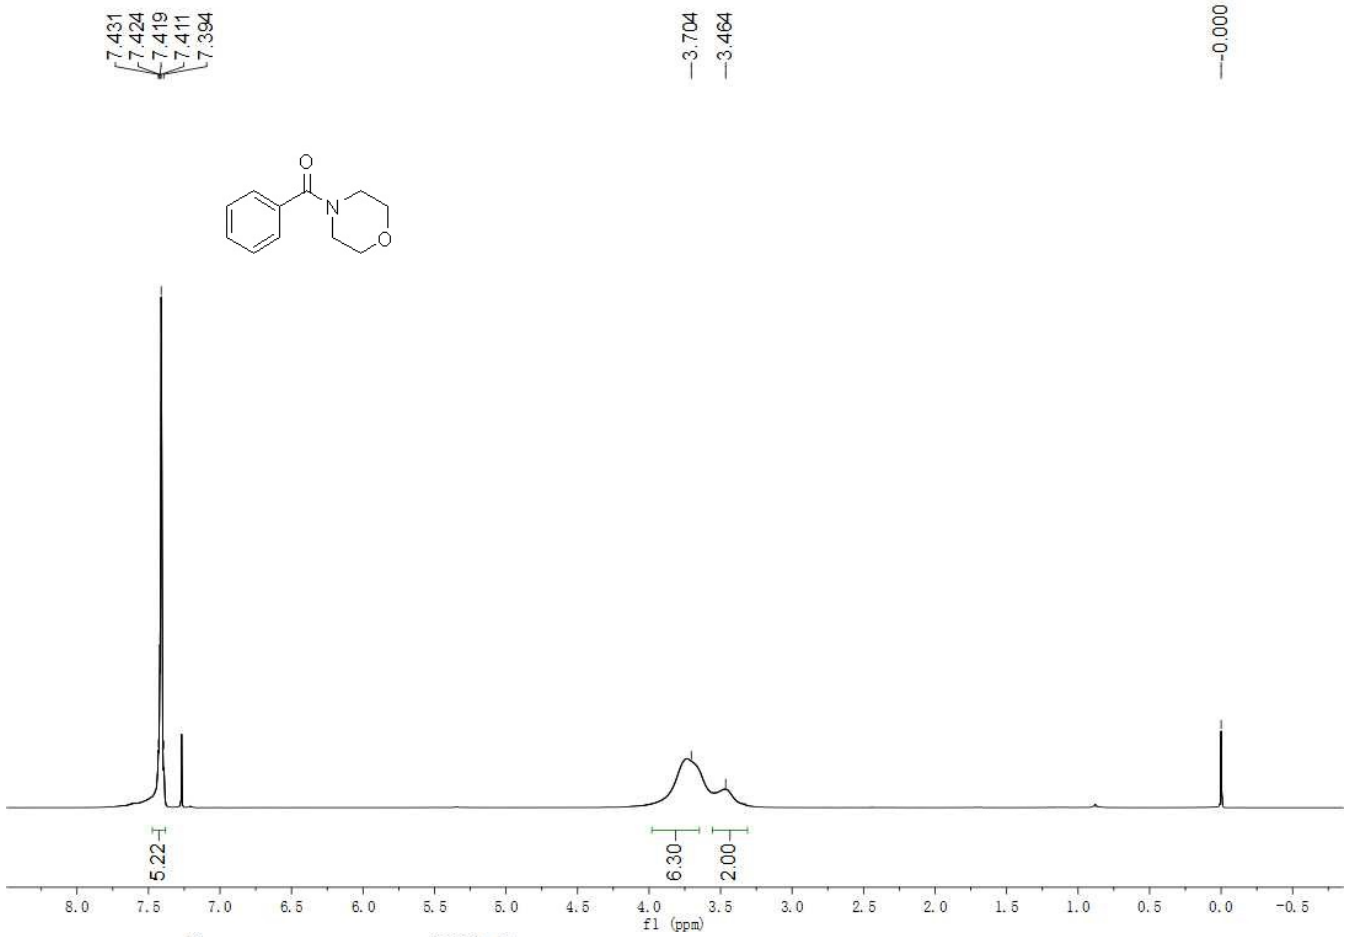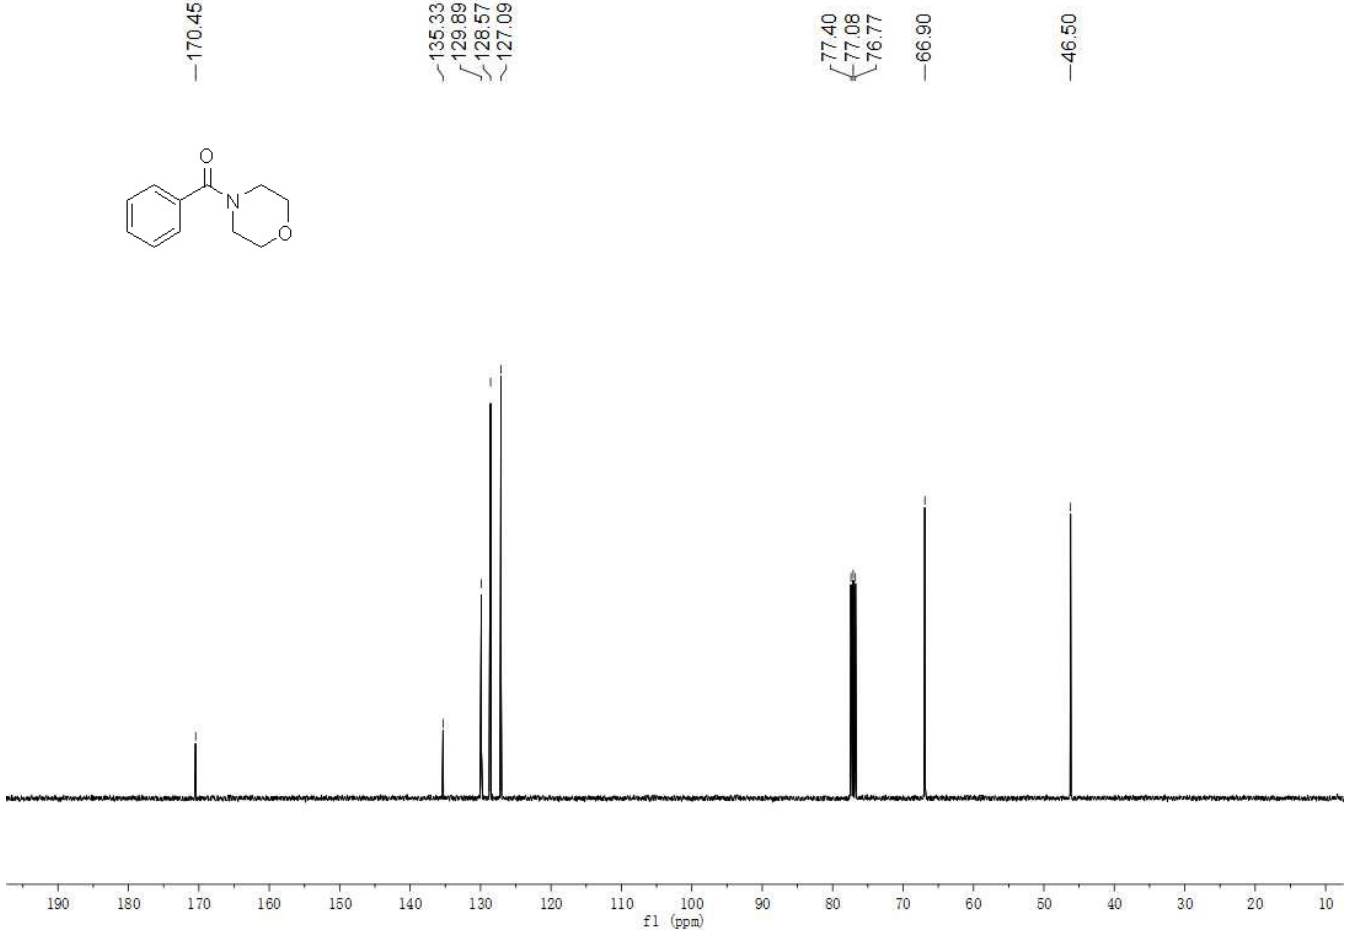

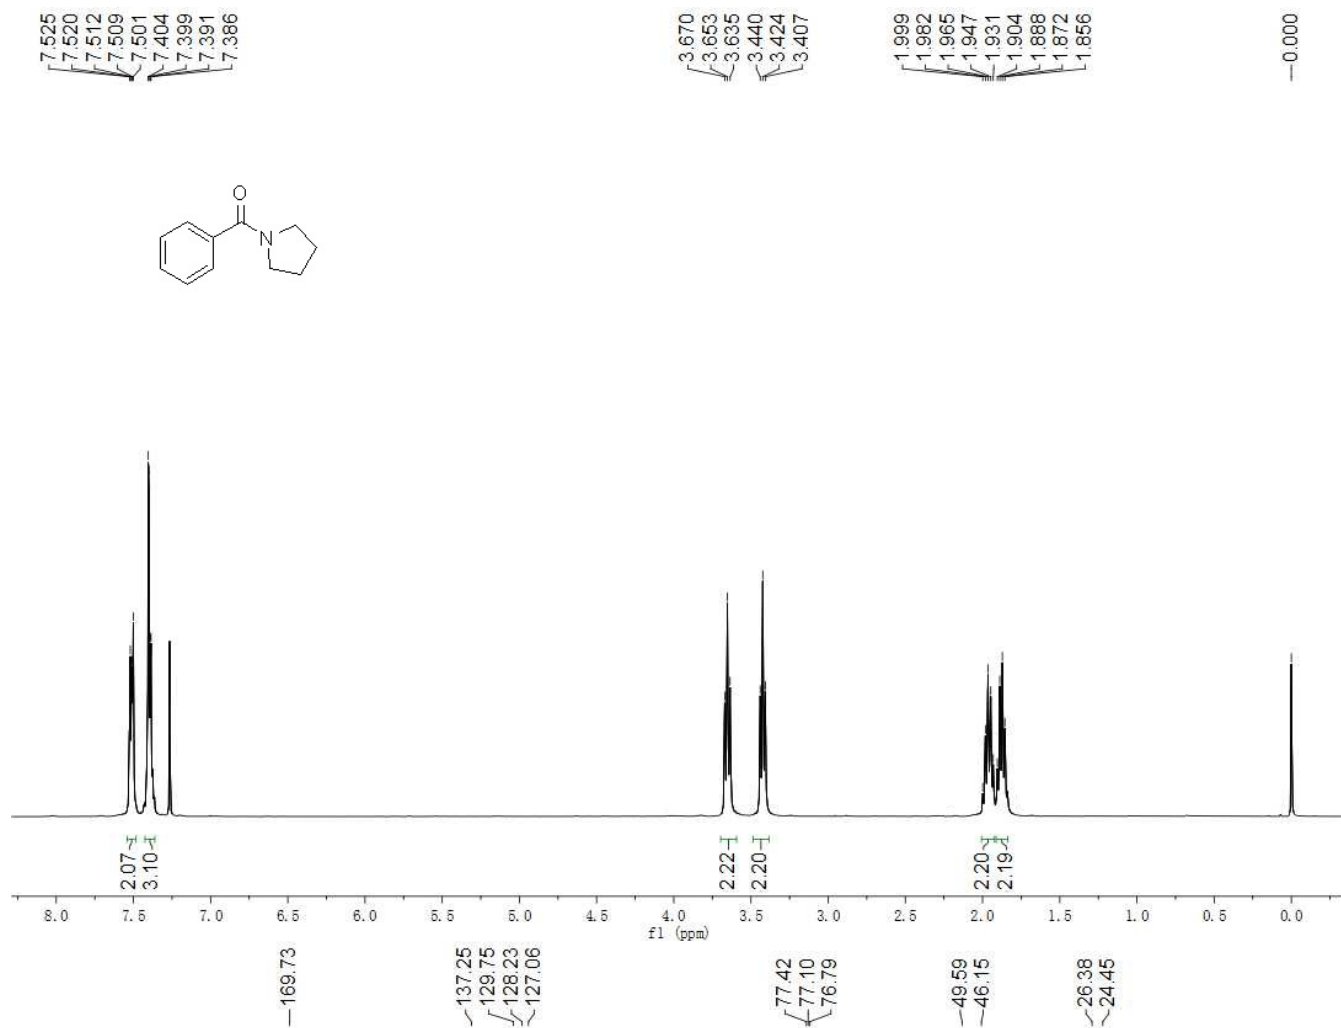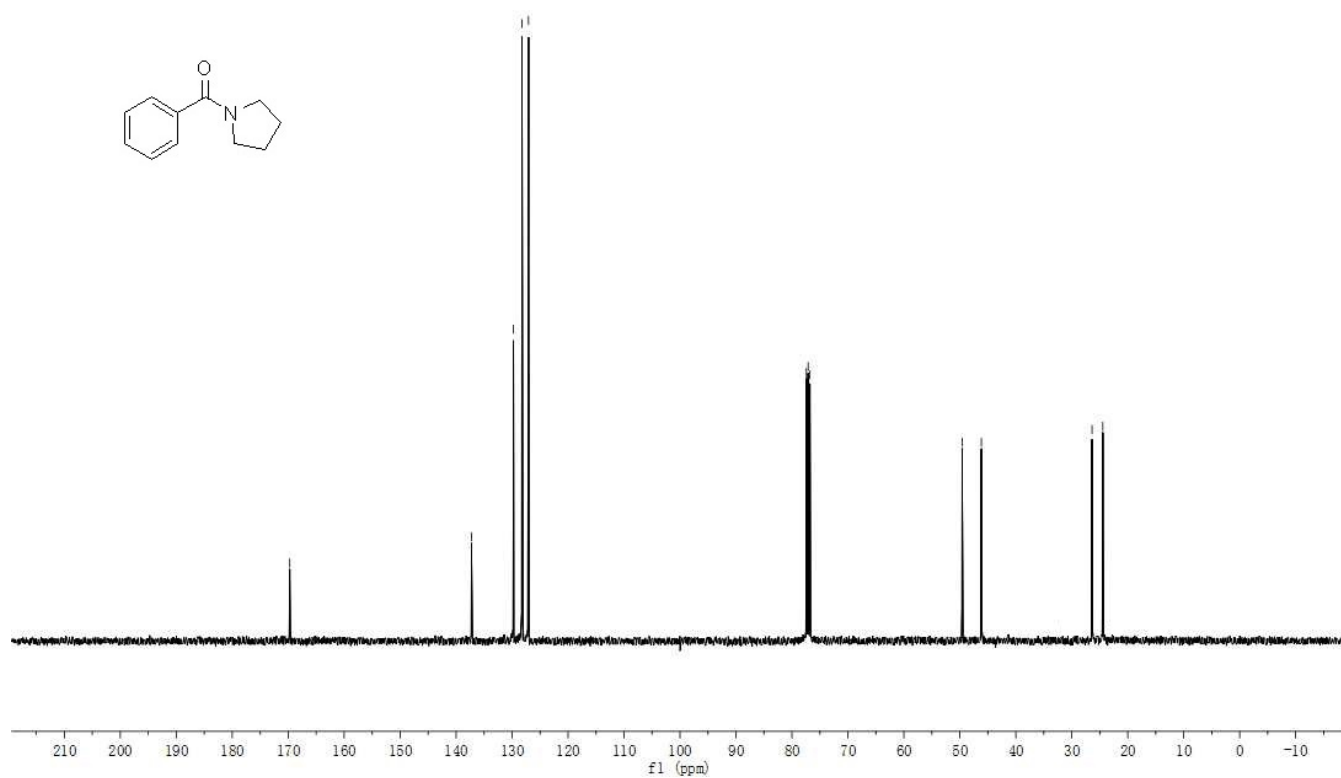

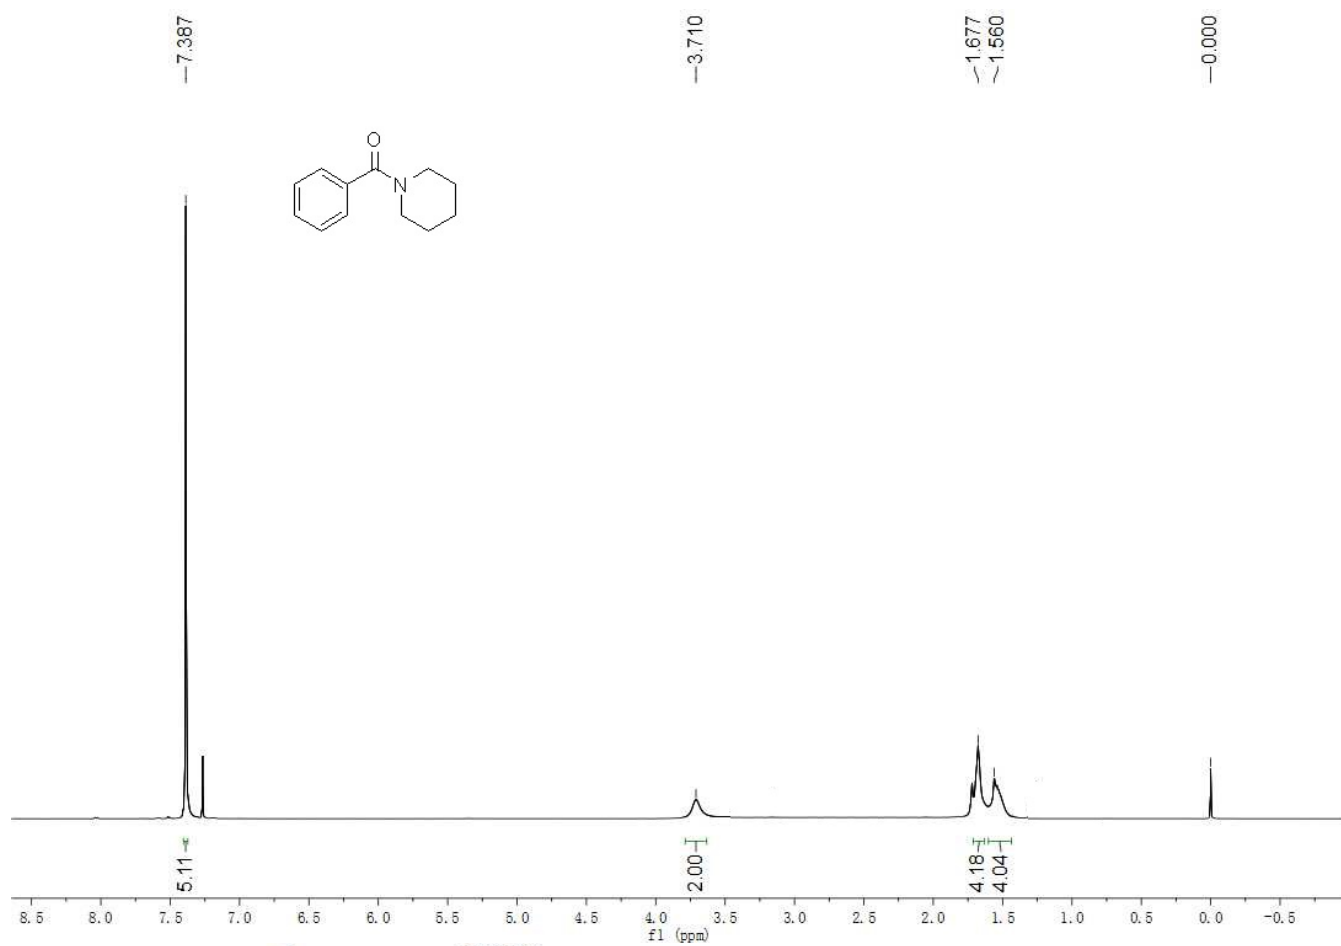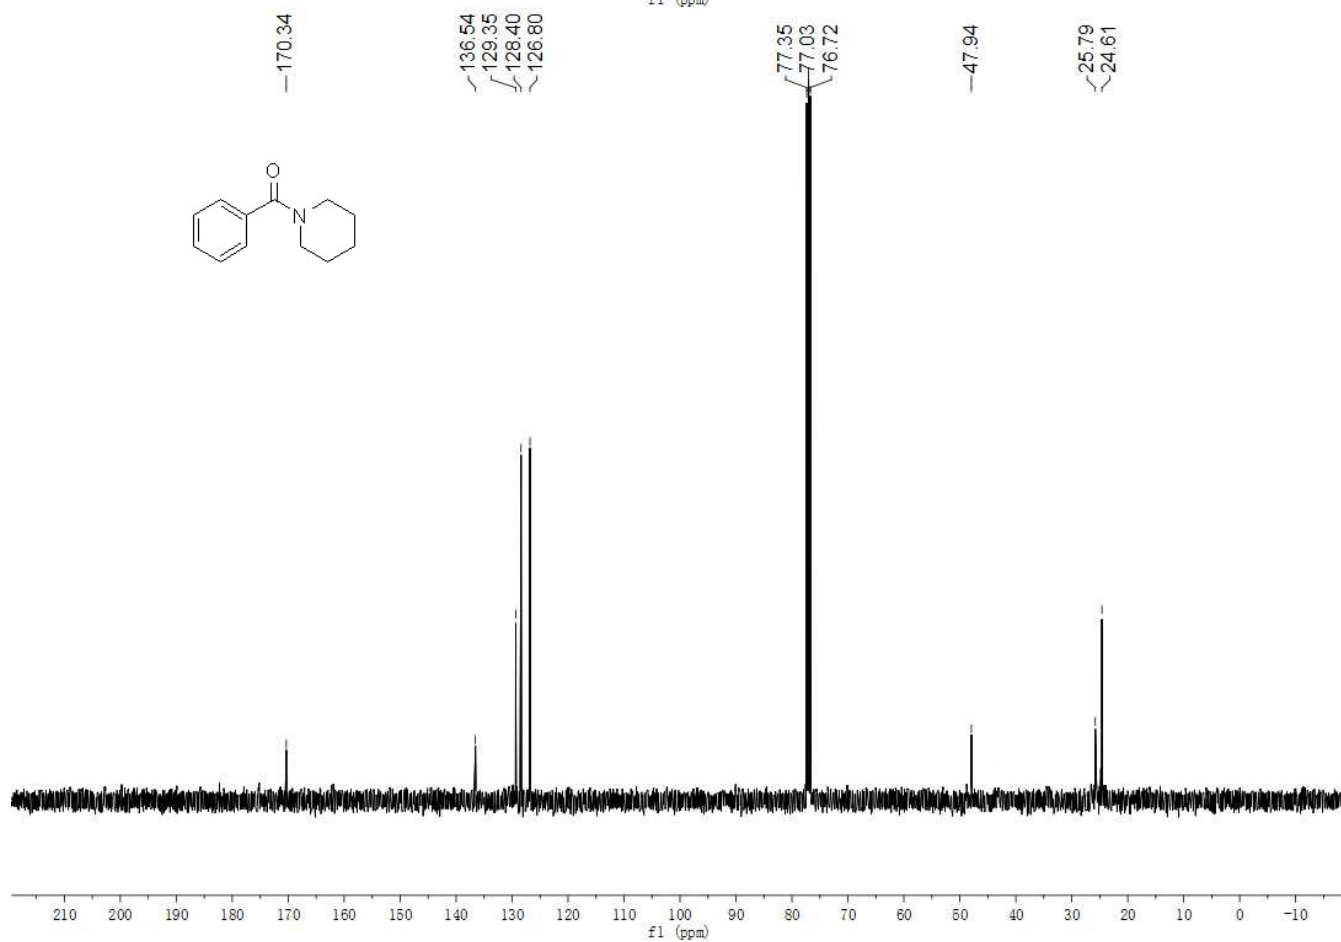

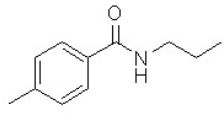

7.667  
7.647  
7.233  
7.213

-6.102

3.440  
3.423  
3.405  
3.390

2.390  
1.683  
1.664  
1.646  
1.628  
1.610  
1.591  
1.004  
0.986  
0.967

-0.000

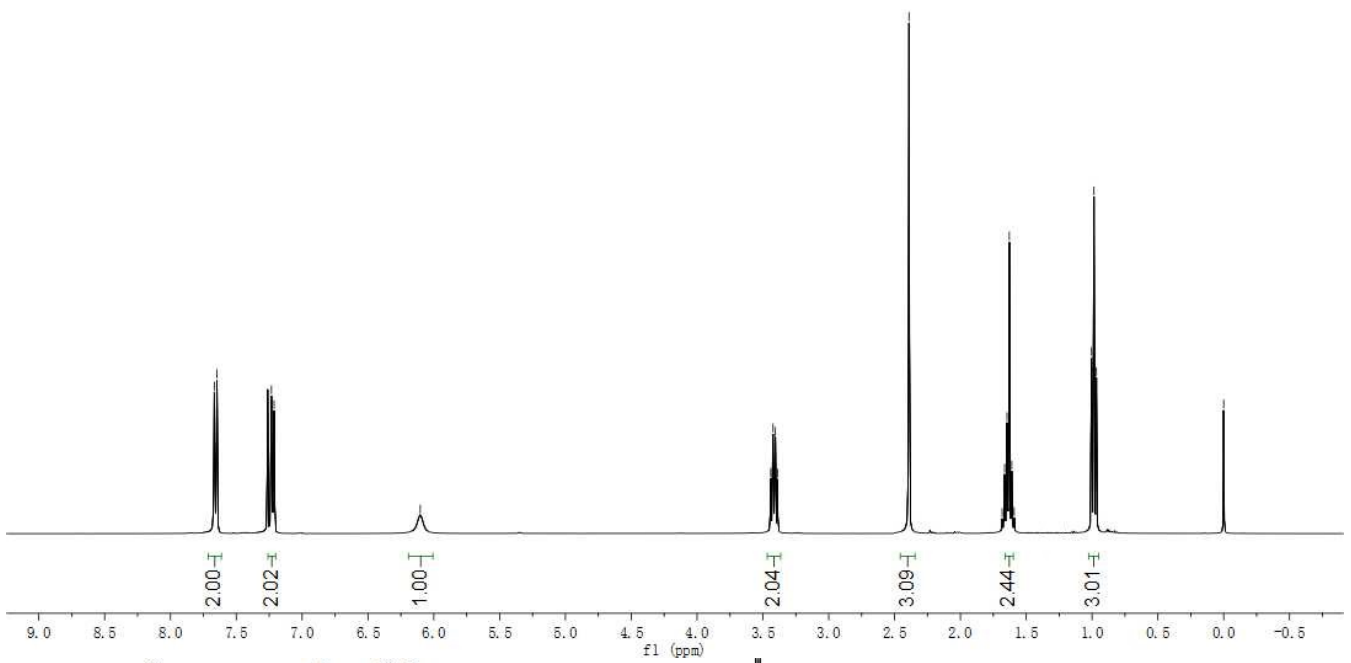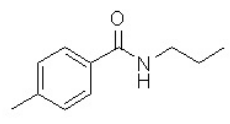

-167.46

-141.67

-132.06

-129.19

-126.81

77.33  
77.01  
76.70

-41.70

-22.98

-21.40

-11.43

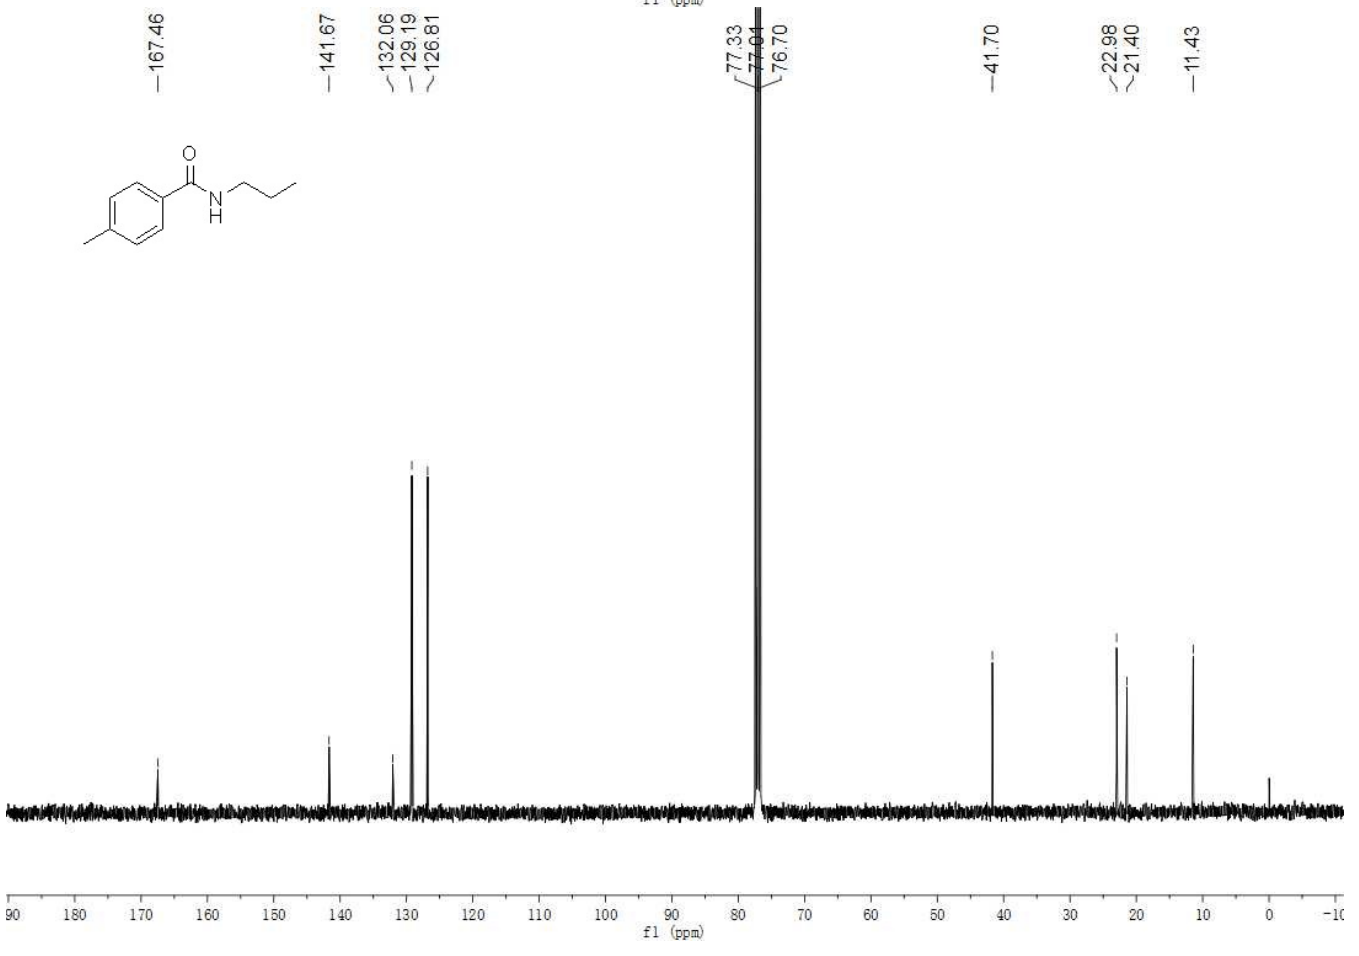

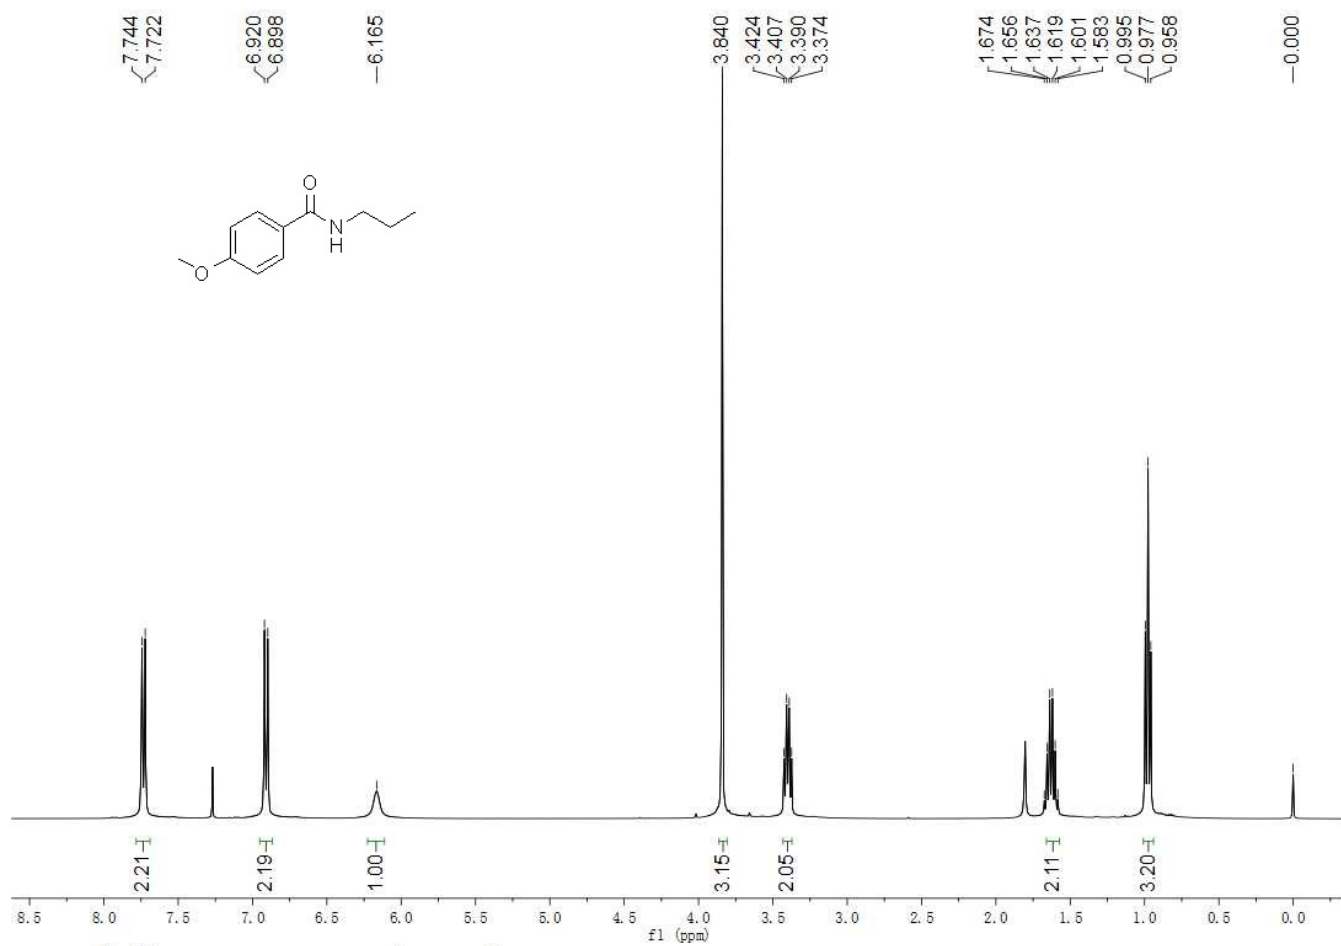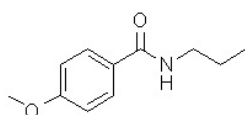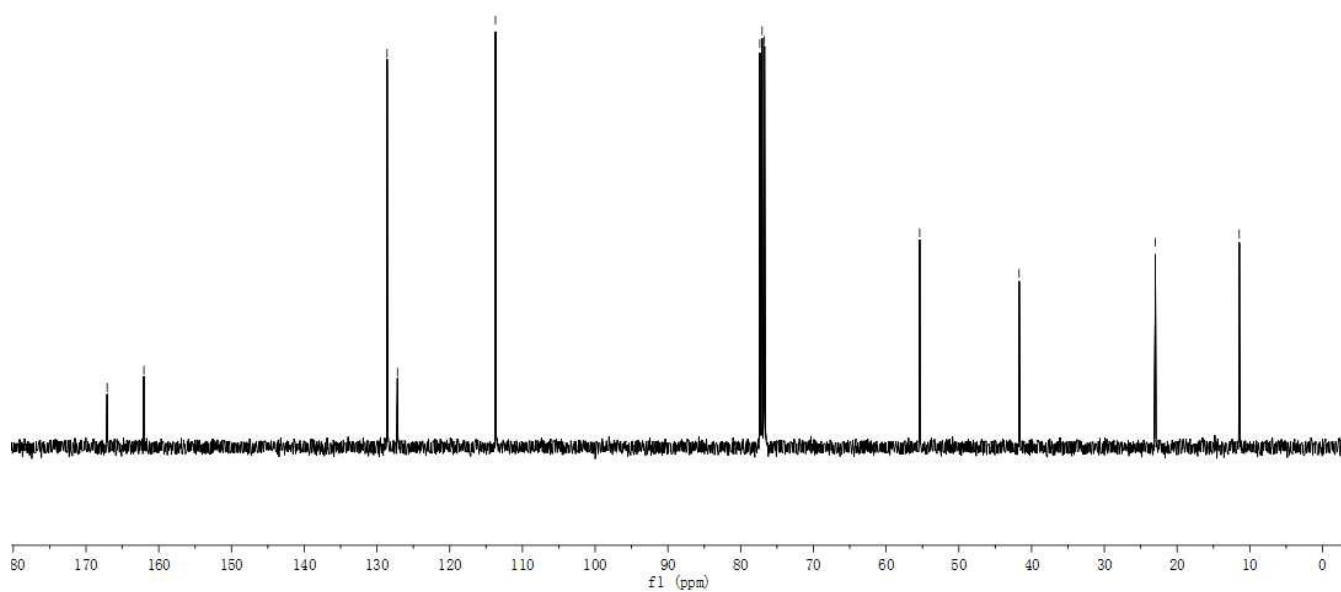

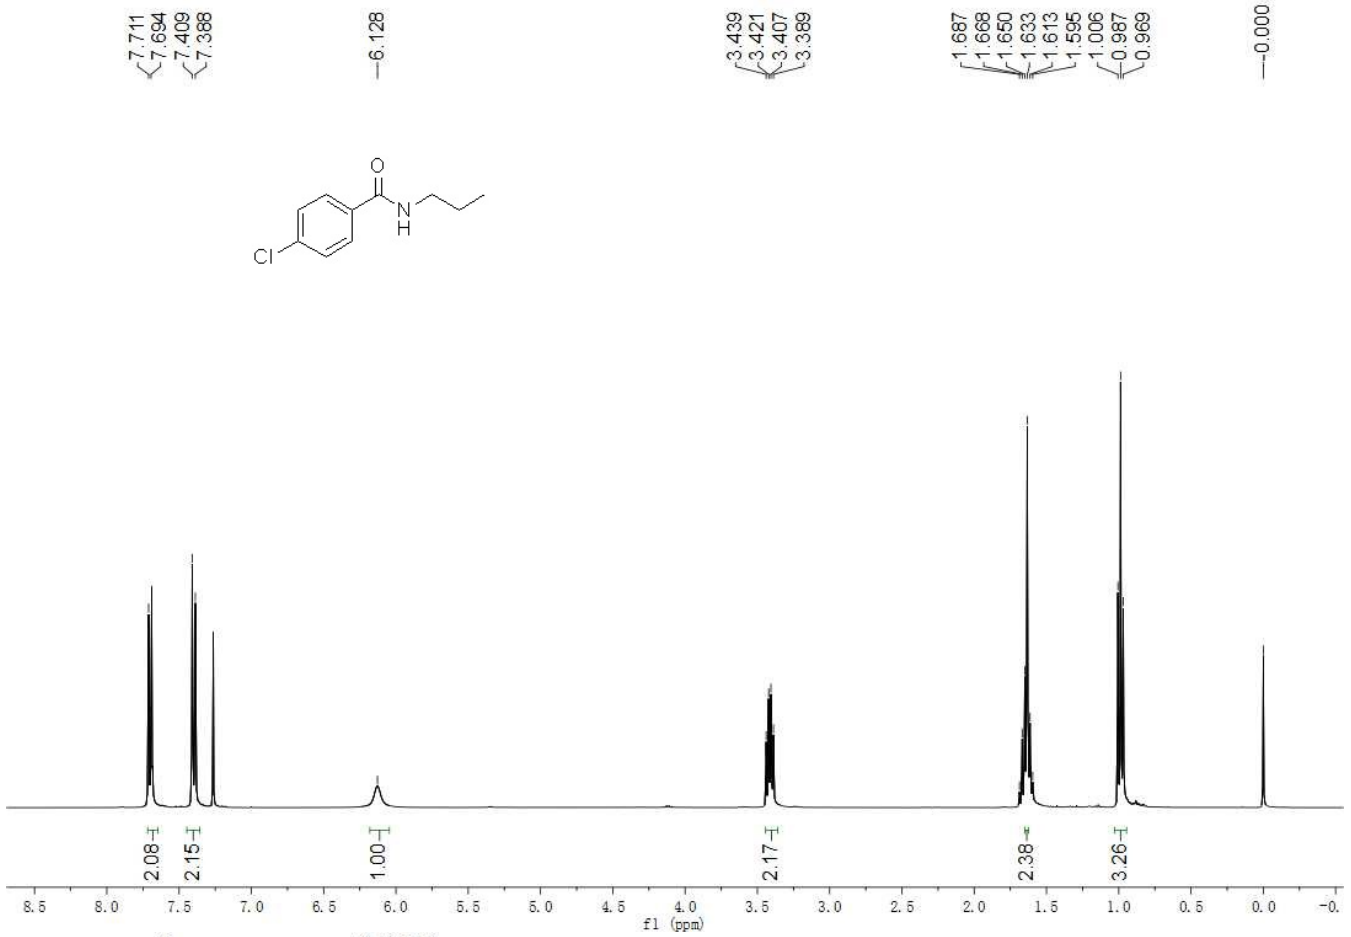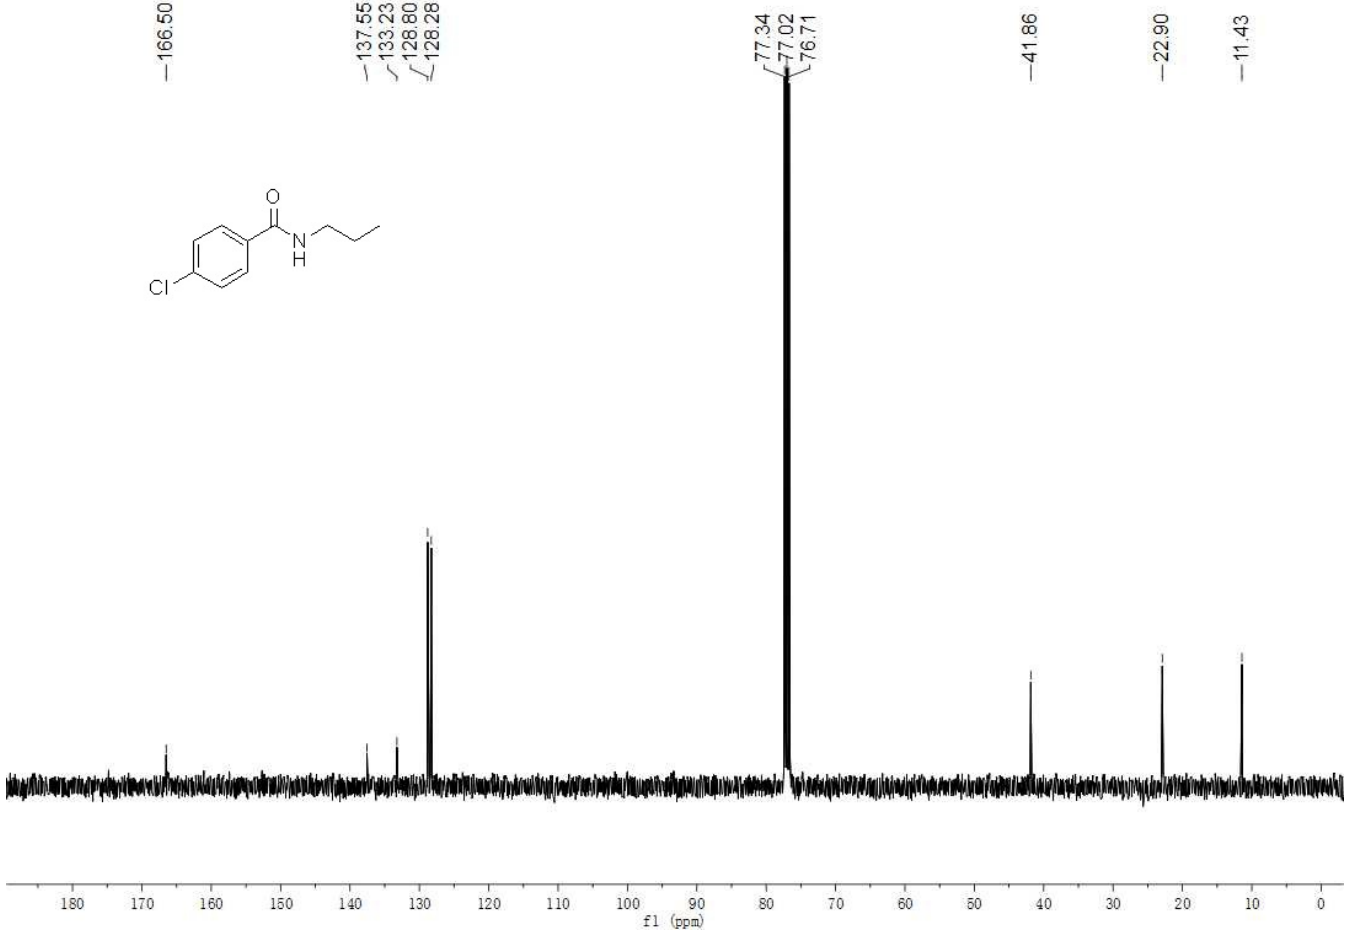

7.642  
7.620  
7.568  
7.547

-6.162

3.433  
3.418  
3.401  
3.383

1.684  
1.665  
1.647  
1.629  
1.611  
1.593  
1.003  
0.984  
0.966

-0.000

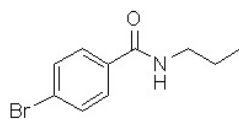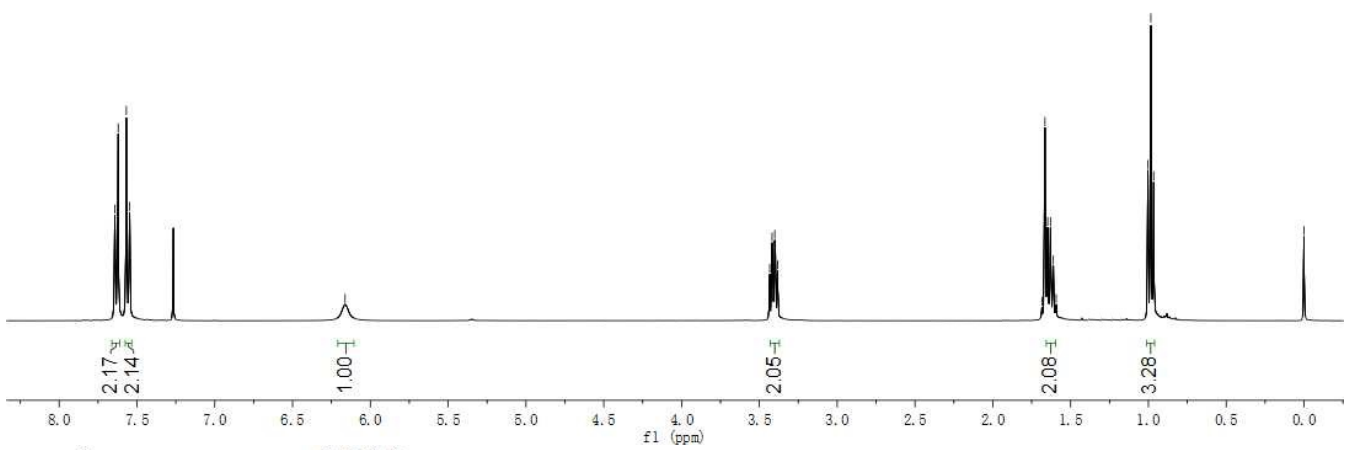

-166.59

133.69  
131.78  
128.48  
125.96

77.34  
77.03  
76.71

-41.87

-22.89

-11.43

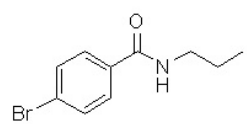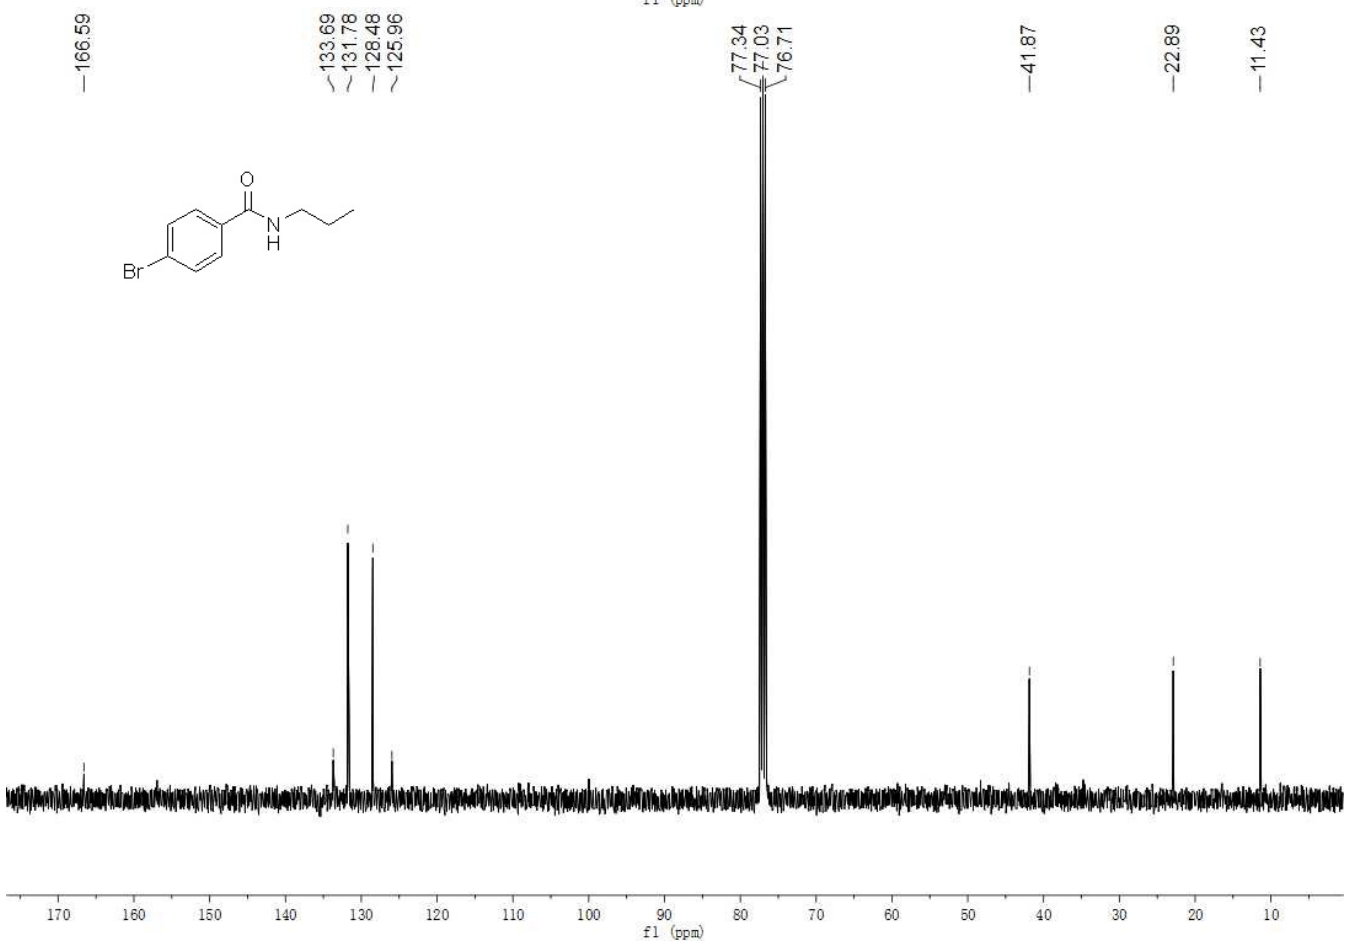



8.296  
8.274  
7.937  
7.915

-6.252

3.480  
3.463  
3.448  
3.430

1.719  
1.700  
1.682  
1.664  
1.646  
1.627  
1.027  
1.008  
0.990

-0.000

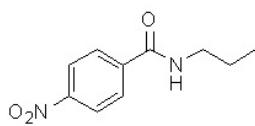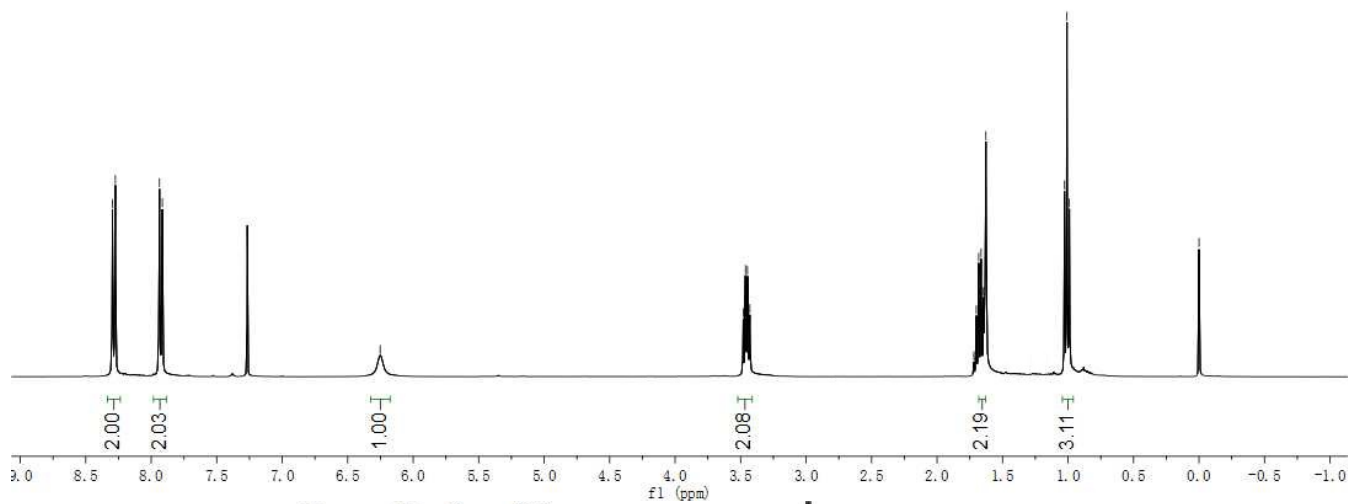

165.54  
149.64  
140.44  
128.05  
123.83  
77.34  
77.02  
76.71  
42.11  
22.82  
11.42

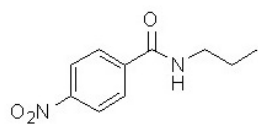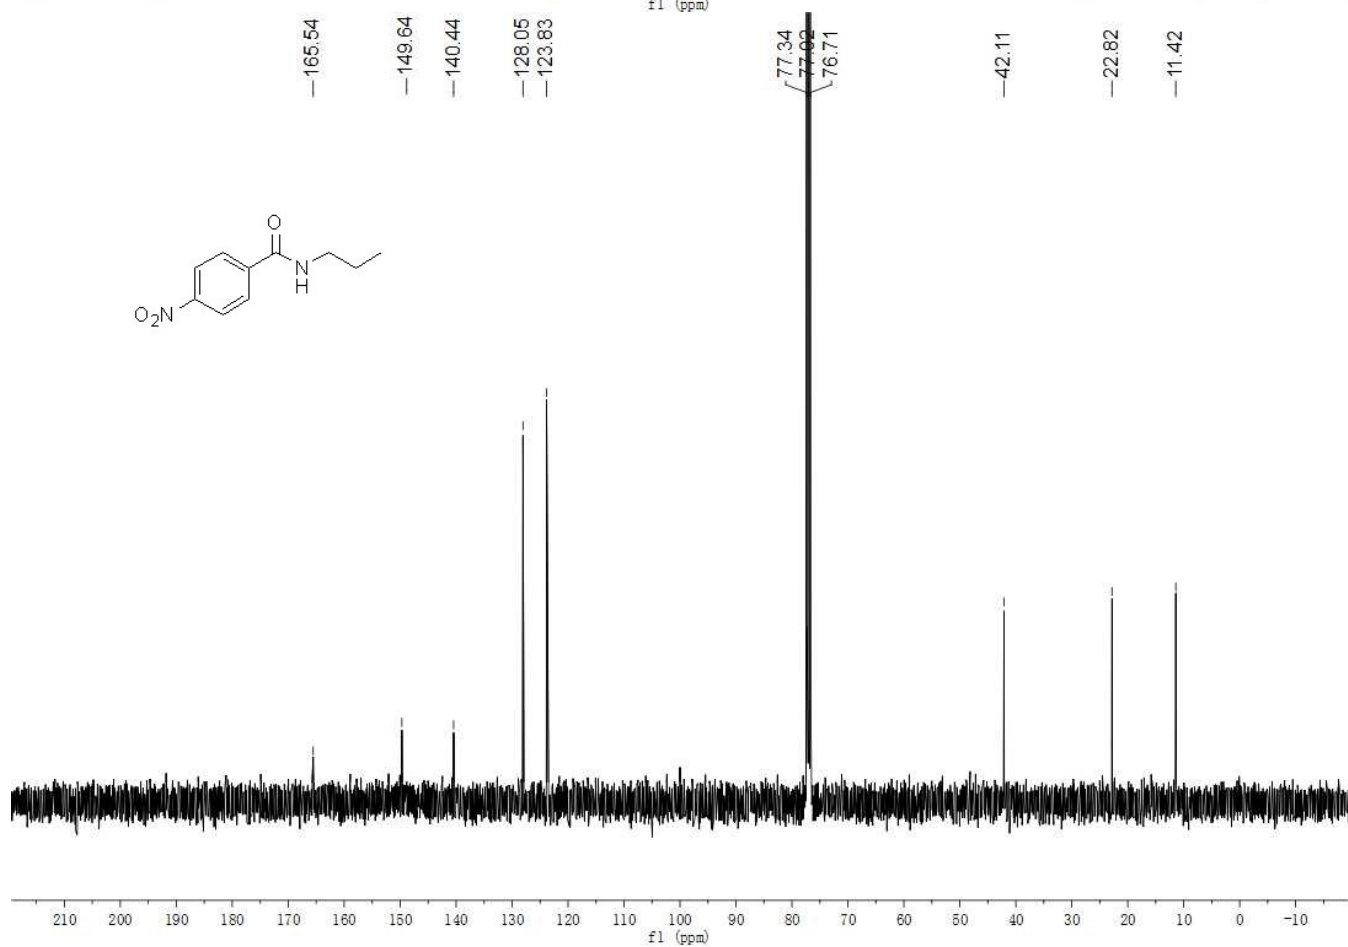

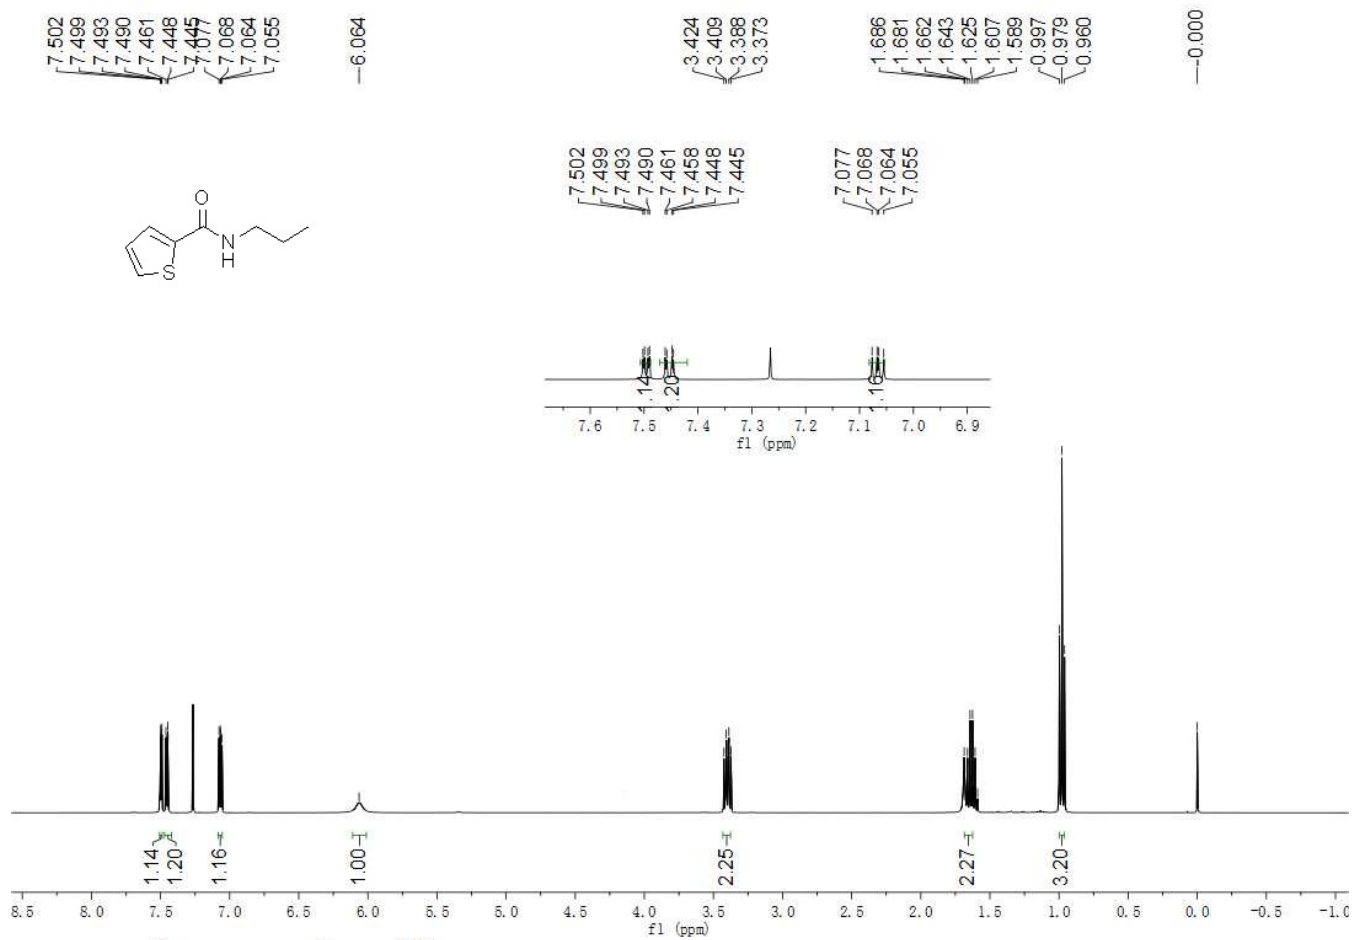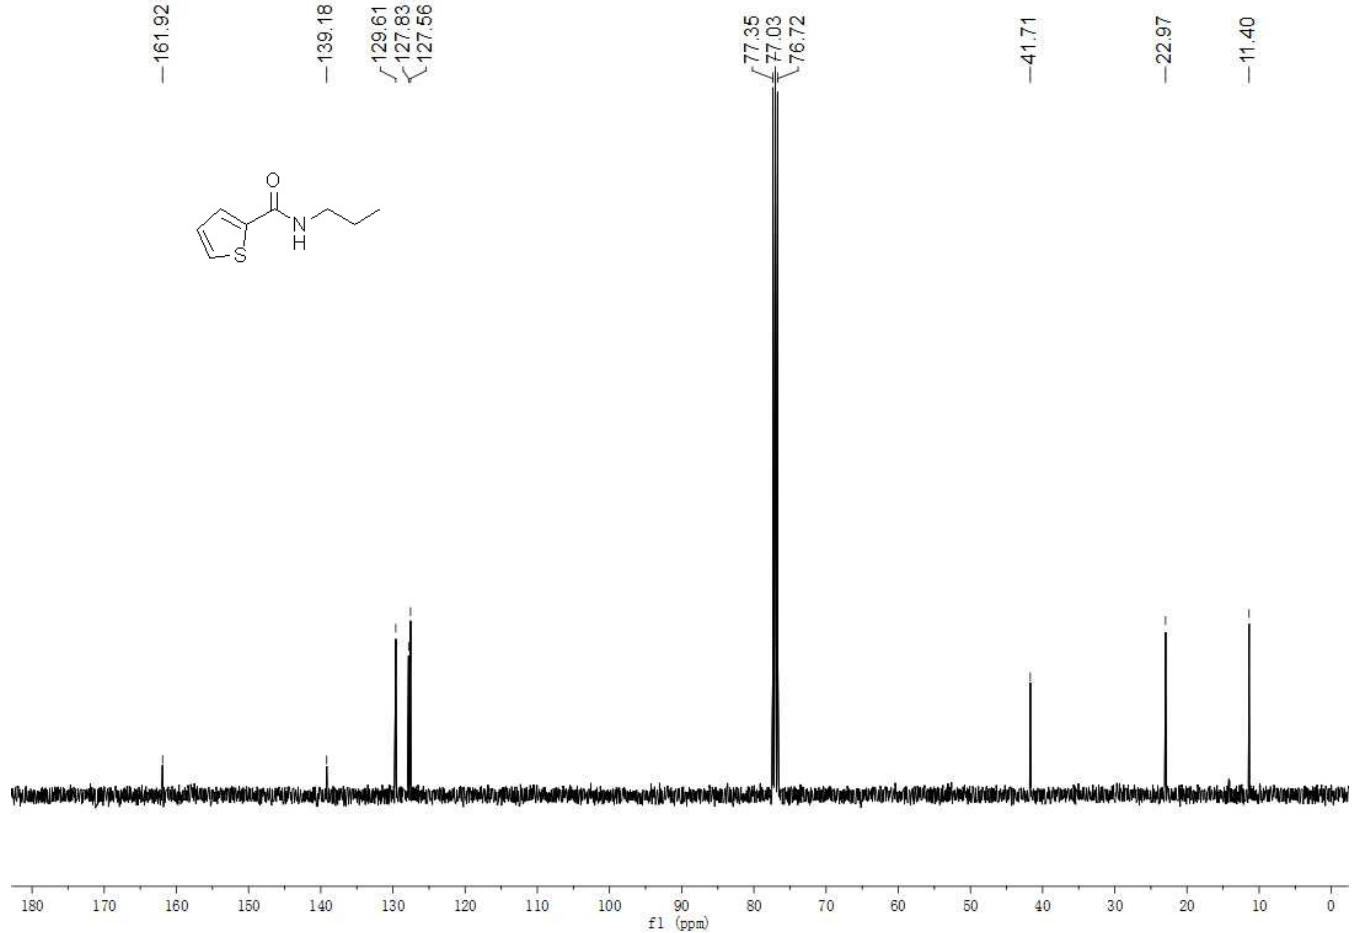

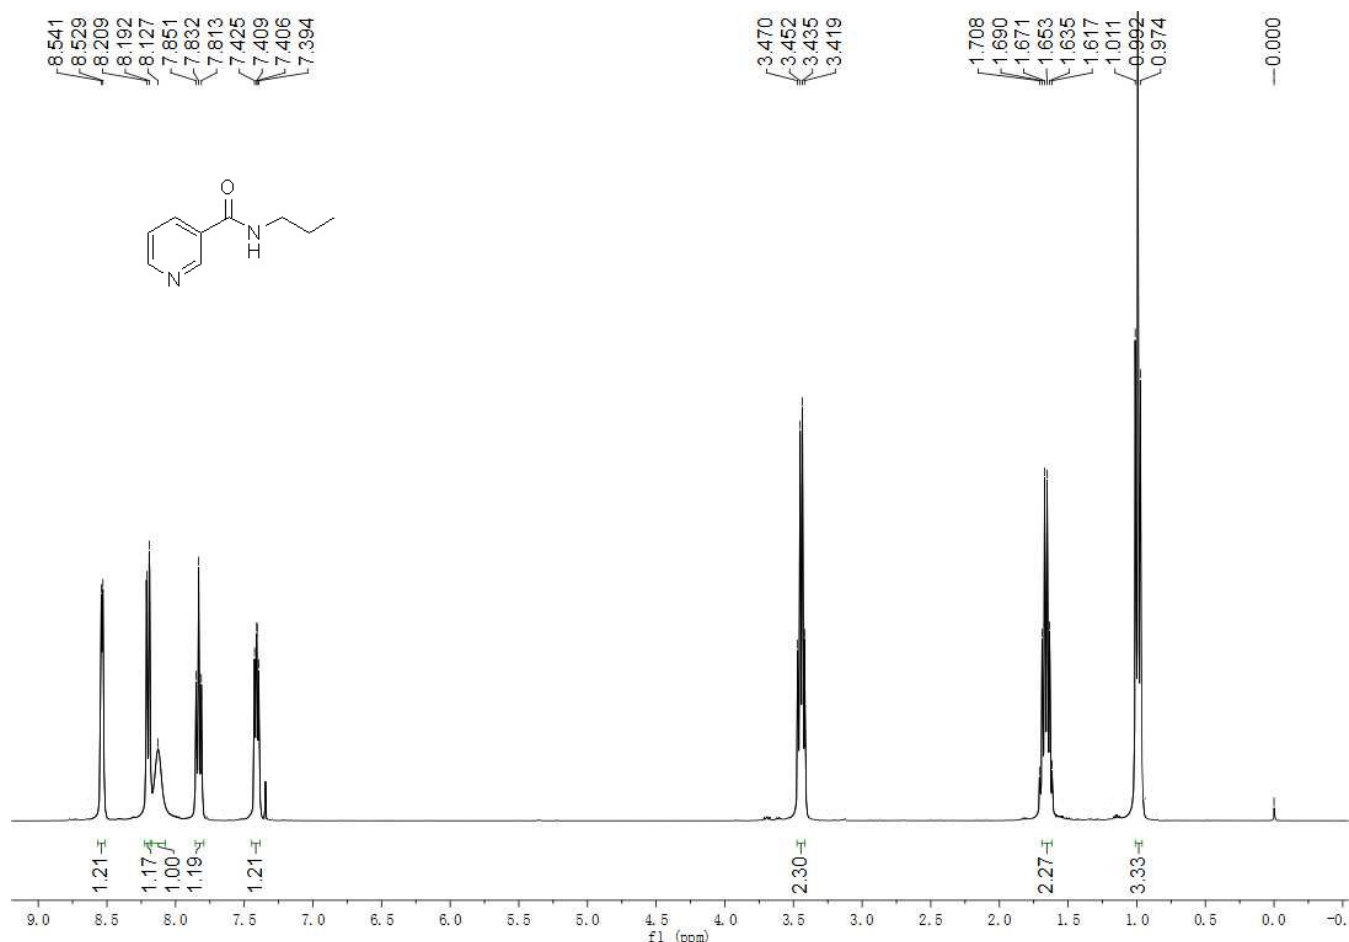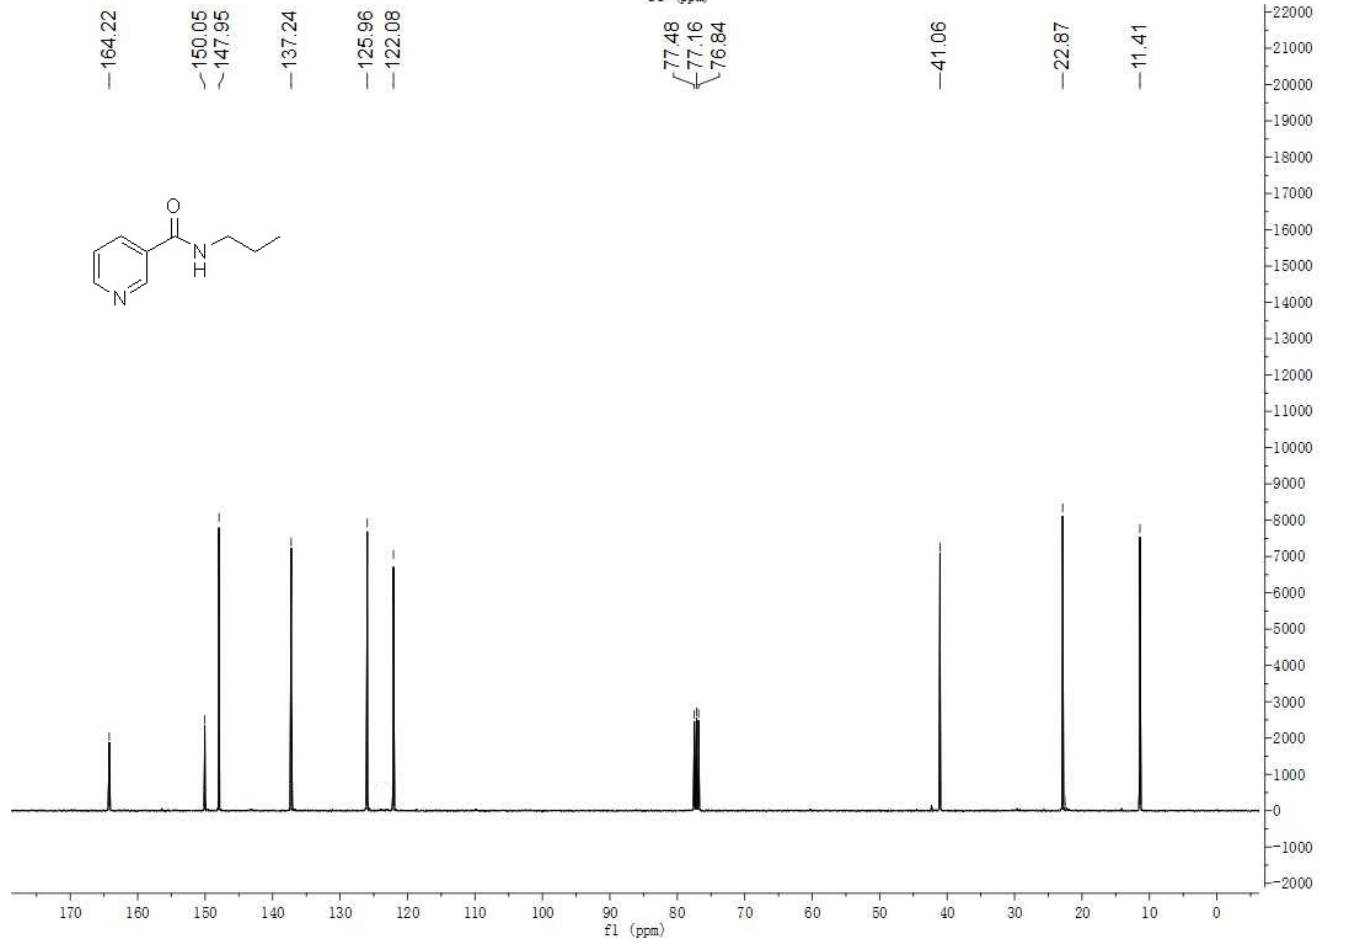

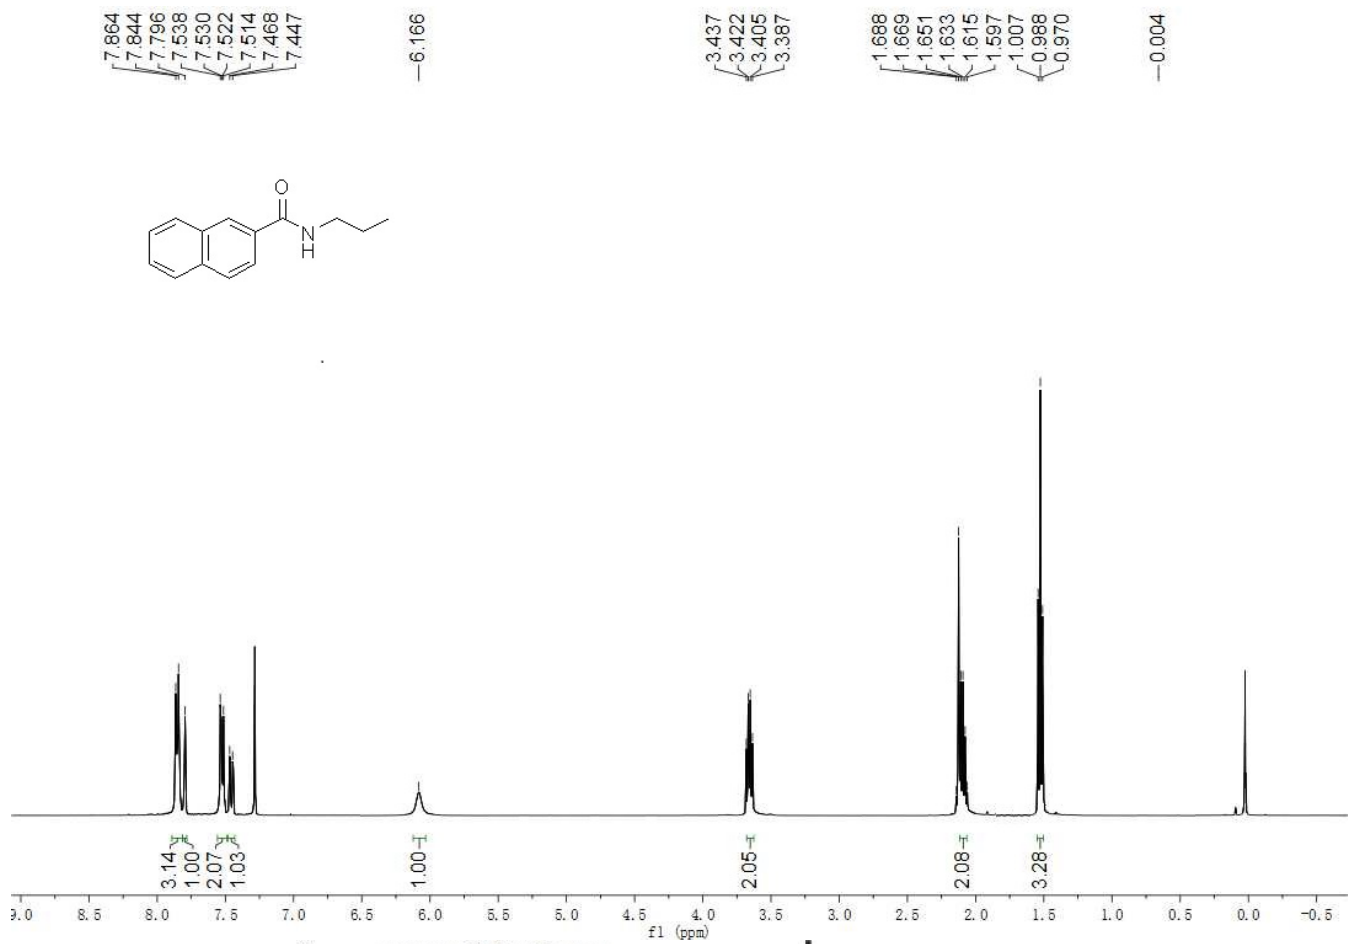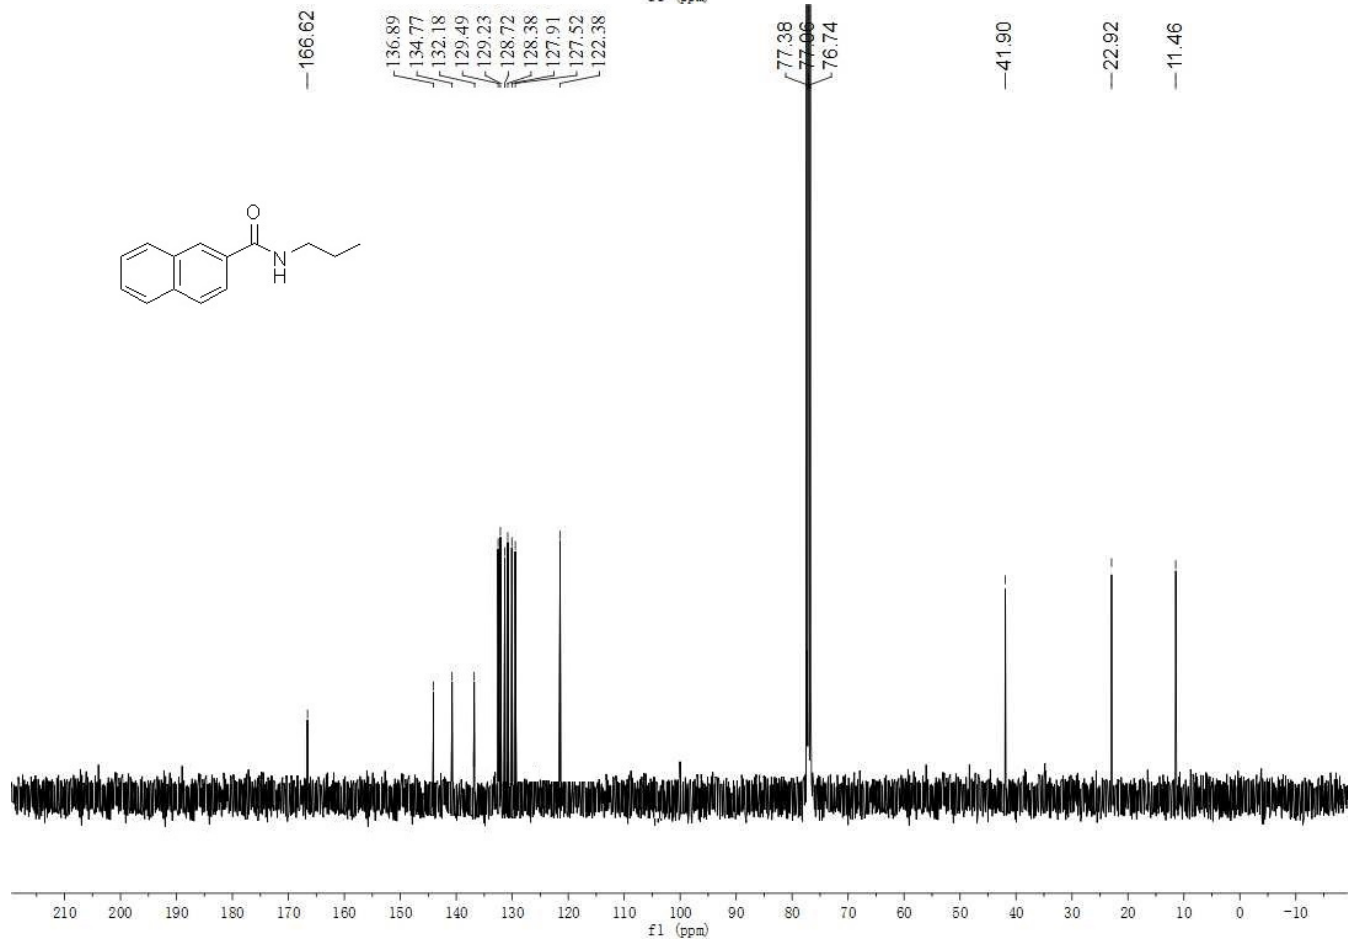

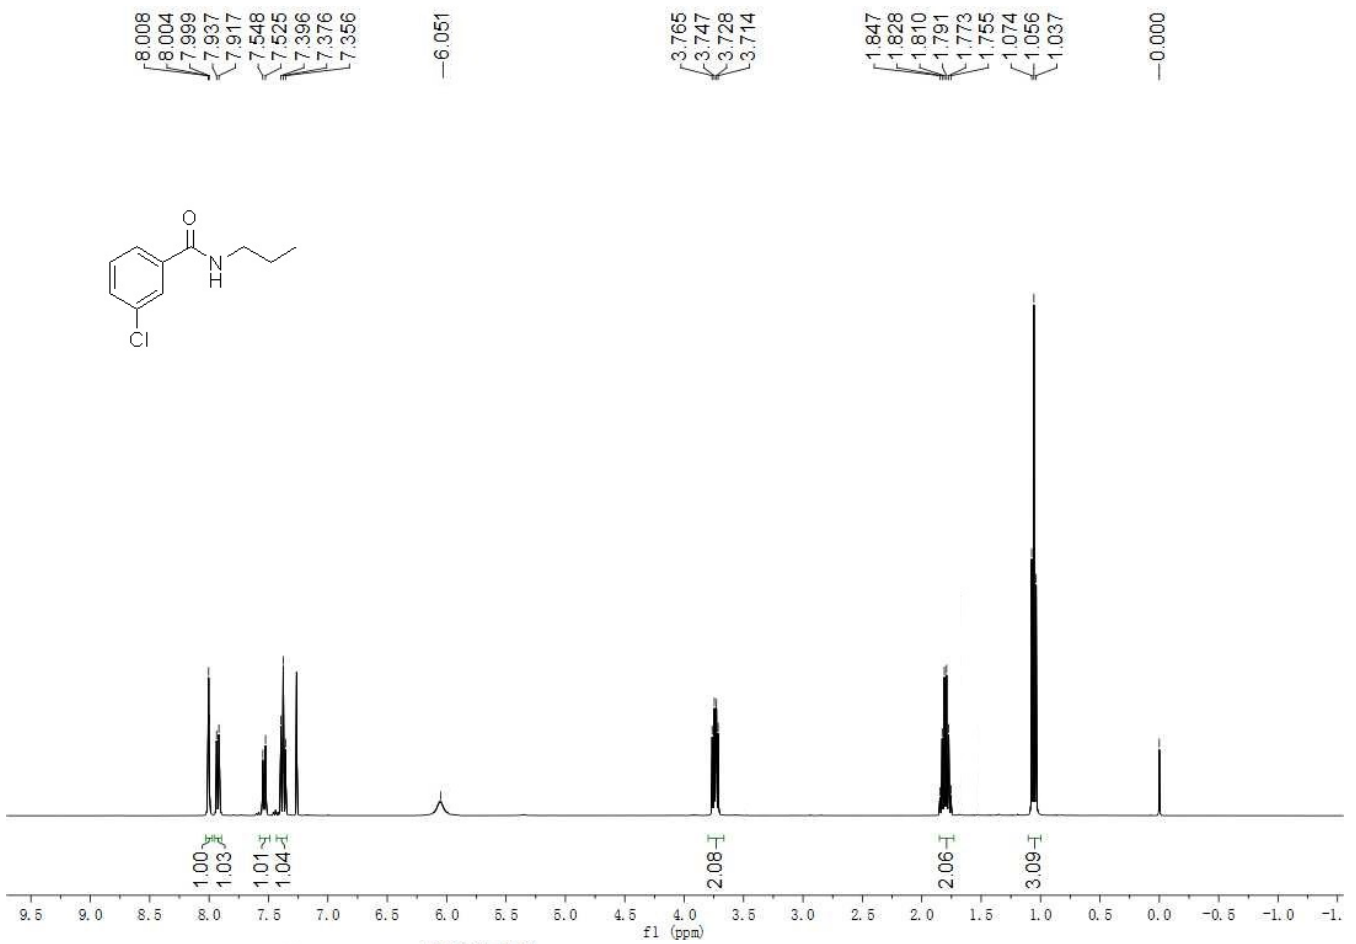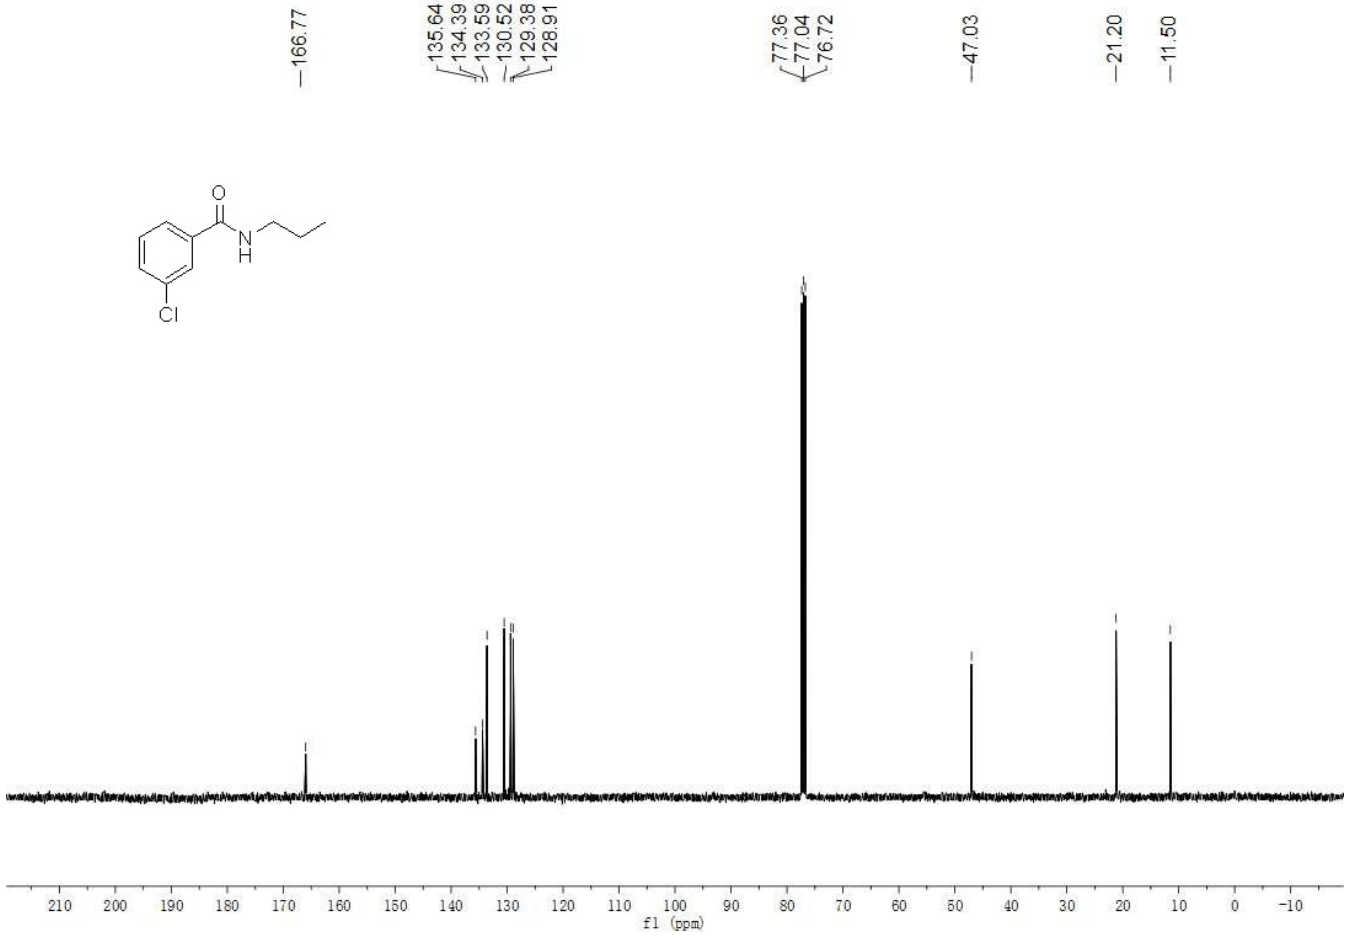

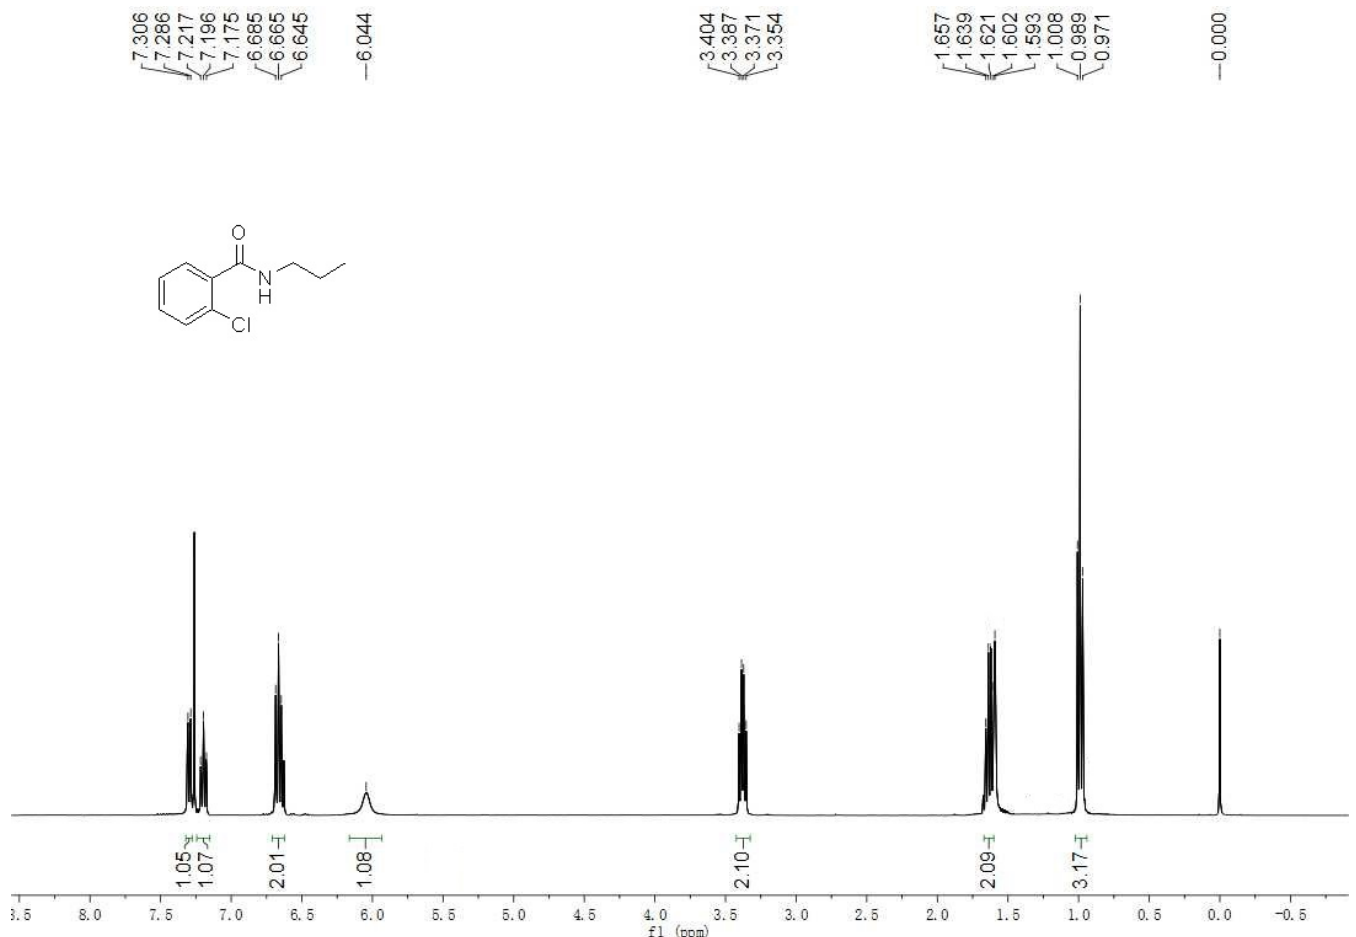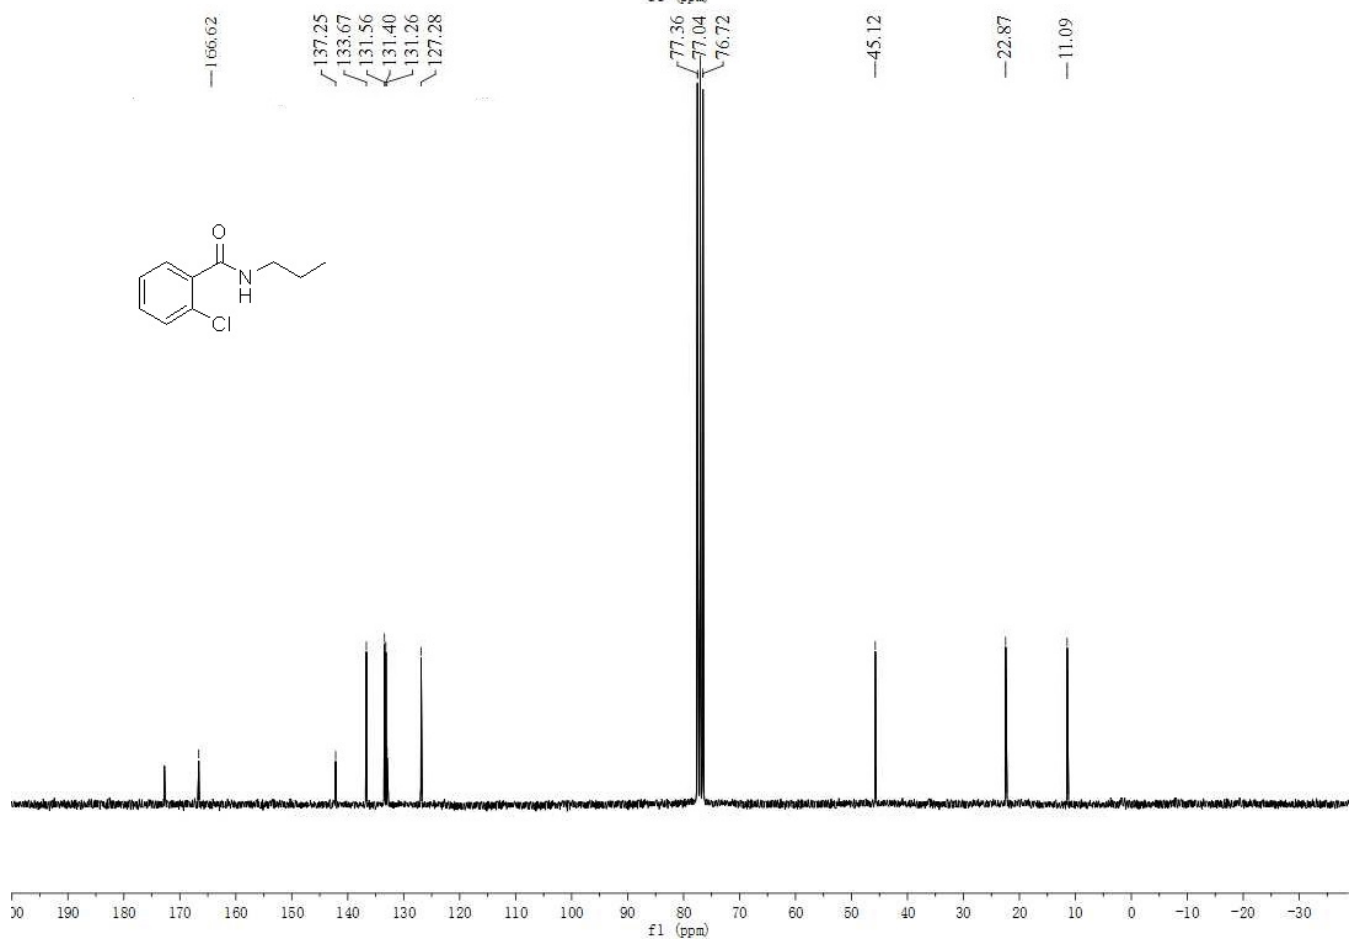

Supplement: d2nj05938j1.pdf [file d2nj05938j1.pdf]
